47 **Abstract**

48 Cancer-associated fibroblast (CAF) heterogeneity is increasingly appreciated, but the  
49 origins and functions of distinct CAF subtypes remain poorly understood. The abundant  
50 and transcriptionally diverse CAF population in pancreatic ductal adenocarcinoma  
51 (PDAC) is thought to arise from a common cell of origin, pancreatic stellate cells (PSCs),  
52 with diversification resulting from cytokine and growth factor gradients within the tumor  
53 microenvironment. Here we analyzed the differentiation and function of PSCs during  
54 tumor progression *in vivo*. Contrary to expectations, we found that PSCs give rise to a  
55 numerically minor subset of PDAC CAFs. Targeted ablation of PSC-derived CAFs within  
56 their host tissue revealed non-redundant functions for this defined CAF population in  
57 shaping the PDAC microenvironment, including production of specific components of the  
58 extracellular matrix. Together, these findings link stromal evolution from distinct cells of  
59 origin to transcriptional heterogeneity among PDAC CAFs, and demonstrate unique  
60 functions for CAFs of a defined cellular origin.

61

62 **Statement of significance:** By tracking and ablating a specific CAF population, we find  
63 that a numerically minor CAF subtype from a defined cell of origin plays unique roles in  
64 establishing the pancreatic tumor microenvironment. Together with prior studies, this  
65 work suggests that mesenchymal lineage heterogeneity as well as signaling gradients  
66 diversify PDAC CAFs.

67

68

69

## 70 **Introduction**

71 Pancreatic ductal adenocarcinoma (PDAC) is defined in part by an exuberant stromal  
72 reaction, including abundant cancer-associated fibroblasts (CAFs) (1-4). Diverse tumor-  
73 supportive functions have been ascribed to PDAC CAFs, including metabolic roles  
74 whereby nutrient transfer from CAFs to neighboring pancreatic cancer cells facilitates  
75 proliferation within a nutrient-poor microenvironment (5-9). In addition, PDAC CAFs  
76 produce cytokines and chemokines associated with immune suppression (10-13), and  
77 CAF ablation in mice fosters efficacy of immune checkpoint inhibitors which are otherwise  
78 ineffective in PDAC (14, 15). Further, perhaps the best known function of activated  
79 fibroblasts in a wound-healing reaction and of CAFs in a tumor microenvironment is to  
80 produce extracellular matrix (ECM) components and remodeling enzymes. The dense  
81 ECM in PDAC physically impedes the vasculature and limits delivery of intravenous  
82 therapeutic agents (16, 17), and PDAC patients with high levels of stiff fibrosis enriched  
83 for matricellular proteins (such as tenascin C) have shortened survival (18). These  
84 findings have motivated efforts to develop therapies targeting CAFs, including inhibitors  
85 of pathways that regulate their phenotypes (e.g., the Hedgehog pathway) (19, 20) or their  
86 immune-modulatory functions (e.g., the CXCL12-CXCR4 axis) (14, 21), and agents  
87 targeting the ECM itself (22).

88         However, the impact of CAFs on PDAC progression and the therapeutic potential  
89 of targeting these cells are controversial. Genetic or pharmacologic ablation of CAFs  
90 during PDAC progression in mice—either targeting alpha-smooth muscle actin ( $\alpha$ -SMA)-  
91 expressing CAFs (15) or Sonic Hedgehog-dependent CAFs (23, 24)—resulted in poorly  
92 differentiated tumors, and caused mice to succumb to disease faster than those with CAF-

93 replete PDAC. In addition, stromal depletion of ECM component type I collagen  
94 significantly accelerated mortality in PDAC-bearing mice (25), and inhibition of collagen  
95 crosslinking by LOXL2 increased PDAC growth and reduced overall survival (26).  
96 Similarly, higher tumor stromal density, including cellular and acellular components of the  
97 stroma, associated with longer overall survival among PDAC patients (26, 27). These  
98 studies highlight the tumor-suppressive or homeostatic potential of PDAC CAFs, and  
99 impel a more thorough understanding of this complex compartment of the tumor  
100 microenvironment with respect to PDAC progression.

101 To reconcile these seemingly contradictory findings, several groups have  
102 postulated that PDAC CAFs are heterogeneous, potentially including subtypes that  
103 support and others that suppress tumor growth. Consistent with this notion, single-cell  
104 RNA-seq and other approaches have revealed transcriptional heterogeneity among CAFs  
105 in murine and human PDAC (11, 12, 28-30). Important considerations moving forward  
106 are the origins of these CAF subtypes and, importantly, their functions. Understanding  
107 the potentially unique functions of CAF subtypes is important in hopes of identifying and  
108 specifically targeting the tumor-promoting mechanisms in the stroma. Understanding CAF  
109 cellular origin(s) is important because blocking the development or activation or tumor-  
110 supportive CAF subtypes may be a viable therapeutic strategy. Identifying CAF origin is  
111 also important for the goal of developing new models to track and manipulate CAFs within  
112 their host tissue in a robust and specific way, as such models are presently lacking. PDAC  
113 CAFs are generally thought to share a common cell of origin: a tissue-resident  
114 mesenchymal cell called a stellate cell (31, 32). Stellate cells are found in two tissues in  
115 the body, the liver and the pancreas (33); while two Cre-based models have informed on

116 hepatic stellate cell fate and function, these models have not been used successfully to  
117 study pancreatic stellate cells (PSCs). As a result, our understanding of PSC biology to  
118 date has been extrapolated from the liver or learned from cell culture studies.

119 In healthy pancreas tissue, PSCs are in a quiescent state, characterized in part by  
120 cytoplasmic lipid droplets that store vitamin A as retinyl esters, and implicated in tissue  
121 homeostasis including recycling of the basement membrane (34). Upon exposure to  
122 tissue damage cues or a stiff growth substrate, PSCs become activated, and trans-  
123 differentiated to a myofibroblastic phenotype. As PSCs can be isolated from healthy  
124 pancreata by density centrifugation on the basis of their lipid content, PSC activation can  
125 be modeled *in vitro*. Transcriptional profiling of PSC activation showed upregulation of  
126 ECM components and remodeling enzymes, growth factors, and other signatures  
127 associated with CAFs, suggesting that PSCs are indeed competent to give rise to CAFs  
128 during PDAC progression. However, as these cells have not been tracked *in vivo* in the  
129 context of tumorigenesis, their contribution to the PDAC microenvironment and their  
130 functions therein remain unknown. Recent work demonstrated that PDAC CAF  
131 heterogeneity results in part from signaling gradients of critical factors including TGF- $\beta$   
132 and IL-1 (12, 35), and that these factors can differentially program PSCs into inflammatory  
133 or myofibroblastic CAF fates *in vitro*. To analyze the fate of PSCs in PDAC *in vivo*, we  
134 developed a mouse model in which we can track and specifically ablate these cells within  
135 the pancreas, leveraging their unique lipid-storing origin. We find that PSCs indeed give  
136 rise to CAFs, but that this PSC-derived CAF population is numerically minor, suggesting  
137 additional and yet-undefined cellular origins for the majority of PDAC CAFs. Importantly,  
138 PSC-derived CAFs play significant, non-redundant roles in modulation of the tumor

139 microenvironment including production of specific components of the ECM, suggesting  
140 that these cells or their critical regulators may be therapeutic targets.

141

## 142 **Results**

### 143 **Characterization of a genetic approach to label and track stellate cells in normal** 144 **pancreas tissue**

145 To identify a Cre-based approach to label and track PSCs *in vivo*, we analyzed published  
146 RNA-seq data from primary PSCs and noted very high expression of adipocyte marker  
147 fatty acid binding protein 4 (*Fabp4*) in the quiescent state (36). While *Fabp4* expression  
148 was dramatically downregulated in the activated, fibroblastic state, we reasoned that a  
149 lineage labeling approach driven by *Fabp4* regulatory elements would label PSCs as well  
150 as CAFs derived from them. To address the utility of this approach, we crossed *Fabp4-*  
151 *Cre* mice, developed to study adipose tissue (37), to mice harboring the *Rosa26<sup>ACTB-</sup>*  
152 *tdTomato,-EGFP* (*Rosa26<sup>mTmG</sup>* hereafter) reporter allele (38) (Fig. 1A). In these mice, the  
153 ubiquitous *Rosa26* promoter drives expression of tdTomato followed by a stop codon; in  
154 the presence of Cre, tdTomato and the stop codon are excised, leading to expression of  
155 GFP. As such, all cells of the mouse express tdTomato except Cre-positive cells and their  
156 progeny, which are indelibly labeled with GFP. When we examined pancreata of *Fabp4-*  
157 *Cre;Rosa<sup>mTmG</sup>* mice, we noted rare GFP<sup>+</sup> cells in the periacinar spaces of the expected  
158 morphology and frequency for PSCs based on previously published PSC characterization  
159 and electron microscopy analyses (39, 40) (Fig. 1B). We characterized these GFP<sup>+</sup> cells  
160 in the pancreas to assess whether this lineage label was specific to PSCs within normal  
161 pancreas tissue, and whether GFP labeling was pervasive among PSCs. To assess

162 specificity, we analyzed GFP together with markers of other known pancreatic cell types,  
163 as strong markers for PSCs are largely lacking. We found that CD31<sup>+</sup> endothelial cells,  
164 CD45<sup>+</sup> leukocytes, and NG2<sup>+</sup> pericytes were restricted to the tdTomato<sup>+</sup> population and  
165 lacked the GFP lineage label (Fig. 1C-E, Supplementary Fig. S1A). Though CD31<sup>+</sup>  
166 endothelial cells were all tdTomato<sup>+</sup>, we noted a perivascular localization of a subset of  
167 PSCs, as has been reported for HSCs (Fig. 1C) (41). To further address specificity, we  
168 isolated tdTomato<sup>+</sup> and GFP<sup>+</sup> cells from the pancreas by FACS (Supplementary Fig. 1B)  
169 and measured expression of markers for pancreatic cell types by qPCR (Fig. 1F). We did  
170 not see an enrichment for *Cspg4* (which encodes pericyte marker NG2) in the GFP<sup>+</sup>  
171 fraction, suggesting that the numerically small pericyte population is within the far more  
172 numerous tdTomato<sup>+</sup> cell population (liver was a positive control). Markers of acinar cells,  
173 ductal cells, and beta cells were restricted to the tdTomato<sup>+</sup> fraction, while mesenchymal  
174 marker *Vim* and putative stellate cell/mesenchymal marker *Des* were strongly enriched in  
175 the GFP<sup>+</sup> fraction. These results suggest that GFP specifically marks PSCs within the  
176 pancreas of *Fabp4-Cre;Rosa26<sup>mTmG</sup>* mice.

177 We next assessed whether GFP pervasively marks PSCs in *Fabp4-*  
178 *Cre;Rosa26<sup>mTmG</sup>* mice, which we analyzed in two ways. We isolated PSCs from the  
179 pancreas by density centrifugation, which broadly captures quiescent PSCs on the basis  
180 of their lipid content. As this is an enrichment but not a purification, we plated cells at the  
181 interface and stained for Desmin, to increase confidence that our analysis extended to all  
182 PSCs but not to any contaminating cell types of similar density. We found that nearly all  
183 PSCs identified by this approach were GFP<sup>+</sup> (Fig. 1G, Supplementary Fig. S1C). To  
184 analyze this a second way, we noted that perhaps the best-known function of quiescent

185 stellate cells is storage of vitamin A in their cytoplasmic lipid droplets as retinyl esters.  
186 This retinoid storage gives stellate cells a blue-green autofluorescence that can be  
187 analyzed by flow cytometry, as previously demonstrated for hepatic stellate cells (42). We  
188 observed the expected frequency of vitamin A<sup>+</sup> PSCs upon flow cytometric analysis of a  
189 single cell suspension of normal pancreas from *Fabp4-Cre;Rosa26<sup>mTmG</sup>* mice  
190 (Supplementary Fig. 1D). When we analyzed our lineage labels among these vitamin A<sup>+</sup>  
191 PSCs, we found that nearly all were GFP<sup>+</sup> (Fig. 1H). These results together suggest that  
192 *Fabp4-Cre;Rosa26<sup>mTmG</sup>* mice feature specific and pervasive GFP labeling of stellate cells  
193 within the pancreas.

194

## 195 **Analysis of stellate cell contribution to the CAF pool in the PDAC** 196 **microenvironment**

197 As our model allows us to track the fate of PSCs during pancreatic tumorigenesis, we  
198 used *Fabp4-Cre;Rosa26<sup>mTmG</sup>* mice to formally address the contribution of PSCs to the  
199 PDAC CAF population. Upon transplantation of *Kras<sup>LSL-G12D/+</sup>;Trp53<sup>LSL-R172H/+</sup>;Pdx1-Cre*  
200 (KPC) PDAC cells into the pancreas of *Fabp4-Cre;Rosa26<sup>mTmG</sup>* hosts, we consistently  
201 observed an expansion of GFP<sup>+</sup> cells in the tumor microenvironment with a CAF-like  
202 morphology (Fig. 2A). To characterize these GFP<sup>+</sup> stromal cells, we stained for CAF  
203 markers including pan-CAF marker Podoplanin (PDPN) (11) and myofibroblastic CAF  
204 marker  $\alpha$ -SMA (28). We found that GFP<sup>+</sup> or PSC-derived CAFs expressed these markers  
205 (Fig. 2B,C), confirming that PSCs give rise to PDAC CAFs and demonstrating that they  
206 yield a subset of CAFs within the previously established myCAF subpopulation. Contrary  
207 to our expectations, however, we noted across PDAC models that PSCs give rise to only



208 a small minority of CAFs, raising the possibility that previously described transcriptional  
209 heterogeneity among these cells is due in part to distinct cells of origin. We confirmed  
210 these findings by flow cytometry, which showed that, in two different KPC-derived models  
211 and using two different CAF cell surface markers (PDPN or PDGFR $\alpha$ ), PSC-derived  
212 CAFs give rise to approximately 10-15% of total PDPN<sup>+</sup> CAFs (Fig. 2D-F). These results  
213 indicate that PSCs give rise to a numerically minor subset of PDAC CAFs, and prompted  
214 us to examine whether this PSC-derived CAF population plays unique roles in the tumor  
215 microenvironment, or whether these CAFs harbor similar transcriptional profiles and  
216 functions to CAFs of other cellular origins.

217

### 218 **Distinct transcriptional profiles of CAFs from a stellate cell or non-stellate-cell** 219 **origin**

220 To assess the potential non-redundancy of PSC-derived CAFs, we analyzed their  
221 transcriptional profiles. To this end, we established PDAC in *Fabp4-Cre;Rosa26<sup>mTmG</sup>*  
222 hosts, isolated GFP<sup>+</sup> (PSC-derived) and tdTomato<sup>+</sup> (non-PSC-derived) CAFs by FACS,  
223 and analyzed gene expression by RNA-seq. This analysis revealed that both CAF  
224 populations express similar levels of broad or pan-CAF markers including *Fap* (which  
225 encodes fibroblast activation protein) and *Pdgn*, and that both populations expressed very  
226 high levels of *Acta2* (which encodes  $\alpha$ -SMA). This transcriptional similarity extended to  
227 the majority of collagen genes. However, we found extensive, significant transcriptional  
228 differences between these CAF populations (Fig. 3A), suggesting that transcriptional  
229 heterogeneity among PDAC CAFs is not only a consequence of cytokine and growth  
230 factor gradients within the tumor microenvironment, but also of mesenchymal lineage

231 heterogeneity. Gene ontology analysis revealed that genes more highly expressed in the  
232 PSC-derived CAF population are significantly enriched for those involved in cell adhesion,  
233 ECM-receptor interaction, and axon guidance (Fig. 3B). The gene identities on these lists  
234 included cell surface adhesion molecules that facilitate leukocyte trafficking and/or cancer  
235 cell spatial patterning but have yet to be characterized on CAFs, including the receptor  
236 tyrosine kinase *Tie1* (Fig. 3C) (notably, *Tek* encoding TIE2 was not enriched among PSC-  
237 derived CAFs). ECM components more highly or uniquely expressed among PSC-derived  
238 CAFs include those implicated in tissue stiffness and PDAC aggressiveness, such as  
239 tenascins including *Tnc* (Fig. 3C) (18) and *Hspg2*, encoding perlecan. Differential  
240 expression of *Hspg2* gains significance in light of a recent study comparing CAFs from  
241 genetically engineered mouse models of PDAC featuring mutant KRAS as well as mutant  
242 p53 (R172H) or p53 loss (43). The authors found that CAFs associated with p53-mutant  
243 PDAC are significantly more pro-metastatic and more effectively promote  
244 chemoresistance than CAFs from p53-null tumors, with both phenotypes driven by  
245 stromal expression of perlecan. In addition, the axon guidance cues expressed by PSC-  
246 derived CAFs include members of the Slit/Robo family, with potential implications for  
247 regulation of tumor innervation. We note that immune-modulatory cytokines and  
248 chemokines as well as genes that make up major histocompatibility complex class II  
249 (MHCII) are strongly enriched in the tdTomato<sup>+</sup> CAF fraction, suggesting that the  
250 previously described inflammatory CAFs or iCAF (28) and antigen-presenting CAFs or  
251 apCAF (11) do not have a PSC origin.

252 We used our RNA-seq datasets to determine a marker combination for PSC-  
253 derived CAFs that could be used to analyze the frequency of this CAF population among

254 PDAC patient samples, in hopes of validating the findings from our mouse models. For  
255 this, we selected the marker combination of  $\alpha$ -SMA, a marker of the majority of CAFs and  
256 those in the myCAF population which include PSC-derived CAFs; and TIE1, which is  
257 highly expressed on endothelial cells but was unique to PSC-derived CAFs among total  
258 CAFs (Supplementary Fig. S2A). When we tested this marker combination on a small  
259 number of PDAC patient tumor sections, we noted a minor population of TIE1<sup>+</sup> $\alpha$ -SMA<sup>+</sup>  
260 CAFs out of the expansive  $\alpha$ -SMA<sup>+</sup> population (Fig. 3D), consistent with patterns in our  
261 mouse models. To analyze the frequency of PSC-derived CAFs in human PDAC,  
262 including heterogeneity across a patient population, we obtained a PDAC tumor  
263 microarray containing four spatially distinct punches from each of 153 patient samples.  
264 We co-stained the array for TIE1 and  $\alpha$ -SMA, and quantified the double-positive CAFs  
265 out of total  $\alpha$ -SMA<sup>+</sup> CAFs. We saw evidence of heterogeneity across this patient  
266 population, with some samples harboring relatively high levels of putative PSC-derived  
267 CAFs and others with very low levels (Fig. 3E). Quantification of CAF frequencies yielded  
268 two important conclusions (Fig. 3F): first, the vast majority of patient samples harbored  
269 putative PSC-derived CAFs at similar frequencies to those observed in our mouse  
270 models; and second, almost all of these patient samples had putative PSC-derived CAFs  
271 as the minority of CAFs in the tumor microenvironment, highlighting the extent of  
272 mesenchymal lineage heterogeneity. To validate these findings in an independent patient  
273 cohort, we obtained 43 PDAC tumor sections, here analyzing a lower “n” but whole  
274 sections instead of small punches on an array. Co-staining of these patient samples  
275 yielded similar results, including heterogeneity in putative PSC-derived CAF frequencies  
276 (Supplementary Fig. S2B), similar frequencies to those observed in mouse models in the

277 majority of patient samples (Fig. 3G), and a minority of CAFs of a presumed PSC origin  
278 in all of these patient samples. Together, these results suggest that mesenchymal lineage  
279 heterogeneity underlies transcriptional heterogeneity among PDAC CAFs, and that this  
280 lineage heterogeneity is relevant to human PDAC.

281

### 282 **Targeted ablation of PSC-derived CAFs via retrograde ductal injection of viral Cre** 283 **to unveil functional significance**

284 We next wished to functionally interrogate PSC-derived CAFs to address whether their  
285 unique transcriptional profile translates to non-redundant roles in PDAC. To address this  
286 question, we aimed to ablate PSC-derived CAFs in established PDAC and analyze  
287 impacts on the tumor microenvironment. Crossing mice with a Cre-inducible diphtheria  
288 toxin receptor allele (*Rosa26<sup>LSL-Hbegf/+</sup>*, iDTR hereafter) (44) into our *Fabp4-  
289 Cre;Rosa26<sup>mTmG</sup>* model together with diphtheria toxin (DT) treatment would lead to  
290 ablation of PSC-derived CAFs, but there were two obvious limitations of this model to  
291 overcome. First, as *Fabp4-Cre* mice feature high Cre activity in adipose tissue, this  
292 strategy would lead to systemic ablation of adipocytes and make our results difficult to  
293 interpret. Second, during characterization of our model, we noted a small population of  
294 CD45<sup>+</sup>GFP<sup>+</sup> cells (about 2% of total intratumoral leukocytes, Supplementary Fig. S3A)  
295 which would also be targeted for ablation with this strategy. Notably, we did not observe  
296 CD45<sup>+</sup>GFP<sup>+</sup> cells in normal pancreas of *Fabp4-Cre;Rosa26<sup>mTmG</sup>* mice, suggesting that  
297 this *Fabp4*-expressing leukocyte population gets recruited into the tissue during tumor  
298 progression. To address these limitations and enable specific targeting of PSC-derived  
299 CAFs, we adapted published methods for retrograde ductal injection of viral particles

300 directly into the pancreas (45, 46). This viral transduction approach achieves spatial  
301 control, limiting Fabp4-Cre to the pancreas and negating effects on adipose tissue, the  
302 hematopoietic system, and other potentially cell or tissue types with Fabp4-driven Cre  
303 activity; this also enables temporal control, introducing Fabp4-Cre in the adult mouse. To  
304 achieve this, we identified a minimal Fabp4 promoter and enhancer element that is highly  
305 active in primary PSCs but small enough to fit upstream of Cre within an AAV vector (see  
306 Methods). During optimization experiments, we found KP1 to be an optimal serotype to  
307 transduce PSCs *in vivo*, such that ductal injection of AAVKP1-Fabp4-Cre resulted in PSC  
308 labeling to a similar extent to that seen in mice harboring a *Fabp4-Cre* allele (Fig. 4A).

309 We next moved to tumor modeling, for which we subjected *Rosa26<sup>mTmG/iDTR</sup>* mice  
310 to a single surgery including ductal injection of AAVKP1-Fabp4-Cre and orthotopic  
311 injection of KPC PDAC cells (Fig. 4B). Established tumors in this model harbored the  
312 expected frequencies of GFP<sup>+</sup> CAFs and lacked CD45<sup>+</sup>GFP<sup>+</sup> cells (Supplementary Fig.  
313 S3B). To assess the functions of PSC-derived CAFs directly, as opposed to secondary  
314 impacts on other cells in the tumor microenvironment, we established tumors in our  
315 *Rosa26<sup>mTmG/iDTR</sup>* hosts transduced with AAVKP1-Fabp4-Cre, enrolled when tumors  
316 reached 5-6 mm in diameter by high-resolution ultrasound, treated with vehicle or DT for  
317 just 5 days to acutely ablate PSC-derived CAFs, and harvested tumor tissue for analysis.  
318 Consistent with selective targeting of a numerically minor CAF population, the DT-treated  
319 tumors retained high levels of CAFs, including those expressing  $\alpha$ -SMA (Fig. 4C). Based  
320 on our transcriptional profiling, we analyzed ECM components enriched in PSC-derived  
321 CAFs and found tenascin C (Fig. 4D, Supplementary Fig. S3C) significantly reduced upon  
322 PSC-derived CAF ablation. Total collagen abundance remained unchanged

323 (Supplementary Fig. S3D), together suggesting that PSC-derived CAFs regulate specific  
324 components of the ECM. Consistent with a broader role in ECM regulation and  
325 mechanosignaling, phospho-myosin light chain 2 (p-MLC2) was markedly reduced upon  
326 ablation of PSC-derived CAFs (Fig. 4E). To test tumor stiffness directly, we analyzed  
327 control and PSC-depleted PDAC by atomic force microscopy, which revealed that tumor  
328 tissues were significantly softer upon ablation of the numerically minor PSC-derived CAF  
329 population (Fig. 4F,G; Young's modulus for control =  $1.02 \pm 0.02$  kPa, PSC-depleted =  
330  $0.74 \pm 0.04$  kPa; normal murine pancreas  $\approx 0.50$  kPa (47)). As tumor stiffness and tumor-  
331 promoting mechanosignaling have been shown to be facilitated in part by STAT3 in PDAC  
332 (18, 48-50), we analyzed levels of phospho-STAT3 (Y705) and found that these signaling  
333 events were markedly reduced upon PSC-derived CAF ablation (Fig. 4H). As these  
334 results suggested that PSC-derived CAFs drive the establishment of a tumor-promoting  
335 desmoplastic milieu, we developed an ECM signature specific to or enriched among PSC-  
336 derived CAFs per our RNA-seq datasets. While collagen and bulk tumor stromal density  
337 associated with a better prognosis in PDAC (25, 27), this PSC-associated ECM signature  
338 associated with a worse prognosis among PDAC patients (Fig. 4I, Supplementary Table  
339 S1). These results suggest that PSCs give rise to CAFs which regulate specific features  
340 of the stromal microenvironment associated with PDAC aggressiveness.

341

### 342 **Relationship between tumor genotype and stromal evolutionary routes with** 343 **respect to CAF origins**

344 Our results in PDAC patients suggested heterogeneity in PSC-derived CAF frequencies,  
345 and led us to question whether tumor genotype regulates stromal evolution from distinct

346 cells of origin. In support of this notion, we observed significantly elevated *Hspg2*  
347 (perlecan) expression in PSC-derived CAFs compared to CAFs of other origins, raising  
348 the possibility that previously reported distinctions between CAFs associated with p53-  
349 mutant versus p53-null PDAC (43) reflect differential recruitment of PSCs into the CAF  
350 pool. To begin to test a relationship between cancer cell-intrinsic p53 status and stromal  
351 evolution, we compared two PDAC models from the same genetic background  
352 (C57BL/6J) and the same driver mutation in KRAS (G12D), but one featuring p53 R172H  
353 and the other featuring p53 loss. We harvested size-matched tumors from these models  
354 in *Fabp4-Cre;Rosa26<sup>mTmG</sup>* hosts and found that total PDPN<sup>+</sup> CAF frequencies were not  
355 different (Fig. 5A), but that PSCs made a significantly lower contribution to the CAF  
356 population in the context of p53-null PDAC (Fig. 5B,C). To assess a causal role for p53  
357 status in regulation of stromal evolution, we generated isogenic models by using Cas9  
358 and two different sgRNAs targeting *Trp53* to knock out p53 in a p53-mutant (R172H)  
359 parental line (Fig. 5D). We then transplanted these lines in pancreata of *Fabp4-  
360 Cre;Rosa26<sup>mTmG</sup>* mice, harvested size-matched tumors, and analyzed CAF lineages by  
361 flow cytometry. We found that loss of p53 led to a reduction of PSC-derived CAF  
362 frequencies out of total PDPN<sup>+</sup> CAFs (Fig. 5E) though we note that, for one of the p53-  
363 null lines, this trend did not reach statistical significance. Further, while p53-null tumors  
364 harbored a substantial CAF population as expected, p-MLC2 abundance was significantly  
365 reduced compared to p53-mutant tumors (Fig. 5F), consistent with a previous study (43)  
366 and with reduced PSC-derived CAF frequencies. These results suggest that cancer cell-  
367 derived factors stimulate stromal evolution, and that PDAC of distinct genotypes may be

368 differentially responsive to stroma-targeted therapies independent of stromal density as  
369 a consequence of distinct mesenchymal cells of origin.

370

## 371 **Discussion**

372 The discovery of stellate cells in the pancreas in 1998 provided a crucial basis for our  
373 understanding of the cellular source(s) of pancreatic fibrosis (39). As hepatic stellate cells  
374 serve as the dominant cellular source of fibrosis in the context of liver injury (41) and  
375 PSCs were shown to have similar fibrogenic potential to their counterparts in the liver  
376 (32), it was reasonable to speculate that PSCs are the cellular source of pancreatic  
377 fibrosis and of the extensive desmoplastic reaction in PDAC (31). Indeed, activation of  
378 PSCs in culture leads to induction of a transcriptional program consistent with CAF  
379 features (36) and, more recently, PSCs were shown to give rise to the previously defined  
380 iCAF and myCAF subtypes in culture upon exposure to defined soluble cues and growth  
381 substrates (35). In light of the plasticity of this cell type and their presumed role as  
382 dominant contributors to the PDAC stroma, we expected our genetic means to track and  
383 ablate PSCs and derivative CAFs would target most or all CAFs in the PDAC  
384 microenvironment. We were surprised to find that PSCs only give rise to a small minority  
385 of CAFs in PDAC, with frequency dependent in part on tumor genotype. As we come to  
386 further understand the functions of this CAF population, we will further analyze clinical  
387 cohorts, leveraging heterogeneity in PSC-derived CAF frequency among patient samples  
388 to investigate potential stratification strategies or tailored therapies informed by CAF cell  
389 of origin.



390           As PSC-derived CAFs have a transcriptional profile distinct from CAFs of other  
391 origins, our results in the context of the recent literature suggest that CAF transcriptional  
392 heterogeneity results from (at least) two sources: signaling gradients differentially  
393 regulating common cells of origin, and mesenchymal lineage heterogeneity. The results  
394 of our PSC-derived CAF ablation experiments suggest that functional heterogeneity  
395 underlies transcriptional heterogeneity. While transcriptional and phenotypic plasticity  
396 among CAFs likely poses some limitations to the feasibility of targeting specific subsets  
397 therapeutically, our model enabling targeted ablation of a defined CAF subset raises the  
398 possibility that CAF subsets have sufficient functional distinctions that targeting these  
399 subsets in preclinical models, to understand their role in PDAC biology, and differentially  
400 targeting them therapeutically may indeed be possible. This notion is supported by a  
401 recent study employing the potent smoothed antagonist LDE225 to effectively inhibit  
402 Hedgehog signaling in mouse models of PDAC (20). This study showed that myCAFs are  
403 partially dependent on the Hedgehog pathway, such that LDE225 treatment markedly  
404 skewed that PDAC CAF population to reduce myCAFs and increase iCAFs. Impacts of  
405 LDE225 treatment on tumor-infiltrating T cells suggest potential immune-suppressive  
406 functions of iCAFs and, as the unique functions of these distinct CAF subsets further  
407 come to light, targeting specific CAFs may emerge as viable combination therapeutic  
408 strategies. To this end, it will be important to extend the functional analyses performed  
409 here to additional CAF populations, pending development of relevant models, to better  
410 understand their distinct roles in the tumor microenvironment and inform on potential  
411 targets for therapeutic intervention.

412           The high  $\alpha$ -SMA expression and ECM production characteristic of PSC-derived  
413 CAFs suggest that they fall within the previously described myCAF (11, 28) or TGF $\beta$  CAF  
414 (12) population. However, as total collagen abundance remains unchanged and  $\alpha$ -SMA<sup>+</sup>  
415 CAFs remain highly abundant upon PSC-derived CAF ablation, this numerically minor  
416 populations seems to be but a subset of the broader myCAF CAF pool. As PSC-derived  
417 CAFs regulate specific ECM components and biophysical properties implicated in tumor  
418 aggressiveness and metastatic progression (18, 43), we speculate that PSCs give rise to  
419 a tumor-promoting myCAF subset, to be investigated in depth in subsequent studies.  
420 However, in light of the apparent dependency of myCAFs on Hedgehog signaling and the  
421 detrimental effects of long-term genetic or pharmacologic SHH inhibition (23, 24), it  
422 seems likely that another subset of myCAFs is tumor-suppressive and promotes a more  
423 differentiated and less aggressive PDAC phenotype. The tumor-suppressive potential of  
424 other myCAF constituents is consistent with prior studies providing correlative evidence  
425 for heightened immune suppression upon reduction in overall myCAF frequency in the  
426 PDAC microenvironment (13, 20). These tumor-suppressive CAF populations and their  
427 homeostatic or beneficial functions will be important to identify, as maintaining these  
428 functions should be a goal of future stroma-targeted therapies.

429           As our data define PSCs as numerically minor contributors to the CAF population,  
430 an important question to address is the cellular origin of the majority of PDAC CAFs.  
431 Analysis of single-cell RNA-seq data from murine PDAC together with publicly available  
432 transcriptional profiles suggests that the previously described apCAFs in fact derive from  
433 mesothelial cells (12). As for the remaining CAFs, including iCAFs and the non-PSC-  
434 derived myCAFs, the origins remain unclear but may come from pancreas-resident

435 fibroblast populations or potentially from the bone marrow. While bone marrow-derived  
436 mesenchymal stromal cells are important contributors to the CAF population in other  
437 cancer types, including breast cancer (51), the contribution of bone marrow progenitors  
438 to PDAC CAFs remains to be determined. Importantly, a recent study employed lineage  
439 tracing and identified two distinct fibroblast populations in normal pancreas tissue, one  
440 marked by the Hedgehog-responsive transcription factor Gli1 and the other marked by  
441 the tissue-restricted mesenchymal transcription factor Hoxb6 (52). These factors label  
442 distinct fibroblast populations in the pancreas which are similar in frequency, but in the  
443 early stages of pancreatic carcinogenesis, the Gli1<sup>+</sup> fibroblast population expands  
444 considerably while the Hoxb6<sup>+</sup> population does not, such that the pancreas-resident, Gli1<sup>+</sup>  
445 fibroblasts are major contributors to the stroma associated with precursor lesions. Future  
446 studies to define the mechanisms shaping PDAC CAF heterogeneity and the unique  
447 functions of distinct CAF subsets will improve our understanding of how the tumor  
448 microenvironment impacts PDAC progression, and perhaps point to important stromal  
449 targets for therapeutic intervention.

450

## 451 **Methods**

452

## 453 **Animals**

454 All experiments performed in mice were reviewed and overseen by the institutional animal  
455 care and use committee at Oregon Health & Science University in accordance with NIH  
456 guidelines for the humane treatment of animals. *Fabp4-Cre* (005069) and *Rosa26<sup>mTmG</sup>*  
457 (007676) mice from Jackson Laboratory were used for PSC analyses and orthotopic

458 transplantation experiments at 8-12 weeks of age, including male and female mice.  
459 *Rosa26<sup>mTmG</sup>* and iDTR (007900) mice from Jackson Laboratory were used for retrograde  
460 ductal injection and orthotopic transplantation for PSC ablation experiments at 8-12  
461 weeks of age, including male and female mice.

462

### 463 **Human tissue samples**

464 Human patient PDAC tissue samples donated to the Oregon Pancreas Tissue Registry  
465 program (OPTR) with informed written patient consent (IRB approved, IRB00003609) in  
466 accordance with full ethical approval by the Oregon Health & Science University  
467 Institutional Review Board were provided by the OHSU Brenden-Colson Center for  
468 Pancreatic Care and the Knight BioLibrary, upon pathology review by Dr. Rosemary  
469 Makar and secondary review by Dr. Christopher Corless.

470 The PDAC tumor microarray was described previously (53). Human PDAC  
471 specimens were obtained from patients who underwent surgical resection of primary  
472 PDAC, under IRB-approved protocol IRB11-000512. This study was conducted under  
473 strict compliance with institutional ethical regulations. The study had minimal risk per the  
474 IRB protocol and thus informed consent was not necessary.

475

### 476 **Immunohistochemistry**

477 For mouse tissue harvest, mice were anesthetized and euthanized according to  
478 institutional guidelines. Pancreas tissue or tumors were excised carefully and fixed  
479 overnight in 10% neutral buffered formalin, or embedded in OCT and frozen at -80°C.  
480 Fixed tissues were paraffin-embedded, sectioned, deparaffinized and rehydrated through

481 an ethanol series and ultimately in PBS. Following antigen retrieval, tissue samples were  
482 blocked for two hours at room temperature in blocking solution (8% BSA) and transferred  
483 to a carrier solution (1% BSA) containing diluted antibodies. Sections were incubated  
484 overnight at room temperature and then washed five times for 5 minutes each in PBS.  
485 Secondary Alexa-fluor conjugated antibodies diluted in the same carrier solution (1:200)  
486 were added to the sections for two hours at room temperature. Sections were then  
487 washed five times for five minutes each in PBS, autofluorescence quenched with the  
488 TrueVIEW reagent (Vector Laboratories), stained with DAPI, and mounted with  
489 Vectashield mounting medium. Fresh-frozen tissues were sectioned, fixed, and used to  
490 stain for CD45 in FC1199 tumors and for NG2 in normal pancreas tissue, then  
491 counterstained with DAPI-containing Vectashield mounting medium for fluorescence  
492 microscopy. Antibodies used for immunohistochemistry were as follows: CD31: Abcam  
493 ab28364, GFP: Cell Signaling Technology 4B10 (mouse) or D5.1 (rabbit), CD45: Abcam  
494 ab25386, NG2: EMD Millipore AB5320,  $\alpha$ -SMA: Thermo Fisher MA511547, PDPN:  
495 Thermo Fisher 14-5381-81, TIE1: Abcam ab111547 (mouse tissues), TIE1: Thermo  
496 Fisher PA527903 (human tissues), TNC: Abcam ab108930, pMLC2: Cell Signaling  
497 Technology 3674, pSTAT3: Cell Signaling Technology 9145. Stained tissues were  
498 imaged using a laser-scanning confocal inverted microscope (LSM 880, Carl Zeiss, Inc.)  
499 and a 40x/1.1 NA water objective or 63x/1.4 NA oil objective was used to image the  
500 samples. Slides were scanned using a Zeiss Axio Scan.Z1 and quantified using QuPath  
501 or Aperio software.

502 For quantification of TIE1/ $\alpha$ -SMA colocalization on human PDAC sections, images  
503 were acquired on an AxioScan.Z1 using a 10x 0.45 NA plan-apochromat lens.

504 Fluorochromes were excited with a Colibri 7 light source (Carl Zeiss), and excitation and  
505 emission light was passed through the following Zeiss filter sets for the appropriate  
506 channel: DAPI- 96 HE; Alexa-fluor 488- HE 38; Alexa-fluor 594- 71 HcRed. Images were  
507 analyzed for colocalization in ZEN v2.3 (Carl Zeiss). Thresholds for the AF594 and AF488  
508 channels were set by eye for each slide (three slides total) for the TMA analysis. Within  
509 each slide, the same thresholds were used across all tissues. Dynamic range was set to  
510 a 14-bit image (16384 maximum intensity).

511

### 512 **Fluorescence activated cell sorting and flow cytometry**

513 For flow cytometry analysis of normal pancreas tissue, pancreata were harvested, briefly  
514 minced with scissors, and digested with 0.02% Pronase (Sigma-Aldrich), 0.05%  
515 Collagenase P (Sigma-Aldrich), and 0.1% DNase I (Sigma-Aldrich) in Gey's balanced salt  
516 solution (GBSS, Sigma-Aldrich) at 37°C for 20 mins. After dissociation, tissue was  
517 triturated until large pieces were no longer visible, and the resulting cell suspension was  
518 filtered through a 100- $\mu$ m nylon mesh. Cells were then washed with GBSS, pelleted,  
519 subject to red blood cell lysis in ACK lysis buffer (Thermo Fisher) for 3 mins at room  
520 temperature, washed in FACS buffer (PBS containing 2% FBS), pelleted, and  
521 resuspended in FACS buffer for flow cytometry to analyze vitamin A positivity based on  
522 autofluorescence using the 405 nm laser on a BD Fortessa flow cytometer. To analyze  
523 endothelial cells, following red blood cell lysis, cells were incubated with CD16/CD32  
524 antibody (BD Biosciences 553141) to block Fc receptors for 2 mins at room temperature,  
525 then stained with a PerCP/Cy5.5-conjugated CD31 antibody (BioLegend 102522) for 30

526 mins on ice. Stained cells were washed with cold FACS buffer, pelleted, and resuspended  
527 in cold FACS buffer for flow cytometry analysis.

528 For analytical flow cytometry or FACS on PDAC tissues, tumors were harvested,  
529 minced with scissors, and dissociated in DMEM containing 1 mg/ml Collagenase IV  
530 (Thermo Fisher), 0.1% Soybean Trypsin Inhibitor (Thermo Fisher), 50 U/ml DNase I  
531 (Sigma-Aldrich), and 0.125 mg/ml Dispase II (Thermo Fisher) at 37°C for 1 hr. Digested  
532 tissues were pelleted, resuspended in 0.25% Trypsin in DMEM, and incubated at 37°C  
533 for 10 mins, then washed with cold DMEM containing 10% FBS and pelleted.  
534 Resuspended cells were filtered through a 100 µm cell strainer, pelleted, washed with  
535 DMEM + 10% FBS, and pelleted again. Cells were resuspended in ACK lysis buffer as  
536 described above, washed with FACS buffer, pelleted, and resuspended in FACS buffer.  
537 Fc block was performed as described above, then cells were stained with antibodies for  
538 30 mins on ice: biotinylated anti-PDPN (BioLegend 127404), biotinylated anti-PDGFR $\alpha$   
539 (anti-CD140a, BioLegend 135910), PerCP/Cy5.5-conjugated anti-CD31 (BioLegend  
540 102522), and/or PE/Cy7-conjugated anti-CD45 (BioLegend 103113). Cells were then  
541 washed with FACS buffer and pelleted. When biotinylated antibodies were used,  
542 incubated with APC Streptavidin (BD 554067) for 30 mins on ice, washed with FACS  
543 buffer, pelleted, and resuspended in FACS buffer. After staining for the purpose of CAF  
544 sorting and subsequent RNA-seq, RNase inhibitor (New England Biolabs M0314, 1:40)  
545 was added to the cell suspension, and CAFs were sorted into TRIzol LS (Thermo Fisher).  
546 Flow cytometry analysis was performed on a BD Fortessa, while CAF sorting was  
547 performed on a BD FACSAria Fusion. Flow cytometry data were analyzed with FlowJo  
548 software. GFP<sup>+</sup> or tdTomato<sup>+</sup> CAF frequencies were calculated out of the total GFP<sup>+</sup> plus

549 tdTomato<sup>+</sup> population, excluding any cells lacking either lineage label which represent  
550 tumor cells.

551

### 552 **Orthotopic PDAC experiments**

553 Male and female mice at 8-12 weeks of age were used as hosts for PDAC orthotopic  
554 transplantation, using genotypes described in the Results section and figure legends.

555 Mice were anesthetized with ketamine and xylazine, and pancreata were injected with 5

556  $\times 10^3$  FC1199 or FC1245 cells (lines provided by Dr. David Tuveson),  $1 \times 10^5$  4662 cells

557 (provided by Dr. Robert Vonderheide), or  $1 \times 10^4$  HY2910 cells (provided by Dr. Haoqiang

558 Ying), all derived from primary PDAC in *Kras*<sup>LSL-G12D/+</sup>;*Trp53*<sup>LSL-R172H/+</sup>;*Pdx1-Cre* mice

559 (FC1199, FC1245, 4662) or *Kras*<sup>LSL-G12D/+</sup>;*Trp53*<sup>flox/flox</sup>;*Pdx1-Cre* mice (HY2910) of a

560 C57BL/6J genetic background. Orthotopic transplantation was performed as previously

561 described (54). For PSC-derived CAF ablation experiments, pancreata were imaged

562 beginning 14 days after transplantation by high-resolution ultrasound using the Vevo 770

563 imaging system; mice were enrolled on study when tumors reached 5-6 mm in diameter.

564 Enrolled mice were treated with sterile PBS or 25 ng/g diphtheria toxin (List Biological

565 Laboratories) by intraperitoneal injection every 2 days and tumors were harvested on day

566 5 post-enrollment for analysis.

567

### 568 **Retrograde ductal AAV delivery**

569 A promoter and enhancer element upstream of mouse *Fabp4* (from Addgene #8858) was

570 cloned into pAAV-iCre-WPRE (Vector Biosystems) upstream of Cre. KP1-serotyped AAV-

571 Fabp4-Cre was generated and tittered by the OHSU Molecular Virology Core. AAVKP1-



572 Fabp4-Cre viral stock was diluted to  $1 \times 10^{10}$  viral genomes/ml in 10  $\mu$ g/ml DEAE-Dextran  
573 (Sigma-Aldrich) in PBS, incubated for 30 mins at room temperature, then placed on ice.  
574 Retrograde ductal injections were performed as previously described (45). Mice were  
575 anesthetized with ketamine and xylazine until non-responsive to toe pinch. Feet were  
576 taped down with surgical tape on a sterile mat. Entire abdomen was shaved, and the  
577 shaved area cleaned with 70% ethanol and betadine. A midline incision was made about  
578 1 inch long, and incision edges were secured with hemostatic forceps. Non-weave sterile  
579 gauze was moistened with sterile PBS. Intestines were gently extracted using circle  
580 forceps, and gently laid onto damp gauze. Intestines were slowly extracted until duct was  
581 visible. Exposed intestines were covered with damp gauze to keep moist, and sterile PBS  
582 was continually added throughout the procedure as necessary to keep gauze and tissue  
583 from drying out.

584 One microvascular clip was placed on the cystic duct near the gallbladder. The  
585 sphincter of Oddi was located; a 30G insulin syringe was loaded with 100  $\mu$ l viral solution  
586 (to inject  $1 \times 10^9$  viral genomes per mouse), and the needle inserted through the sphincter  
587 of Oddi into the common bile duct up to its convergence with the cystic duct, about halfway  
588 to the clip. Viral solution was slowly injected over the course of 2 mins. The needle was  
589 left in place for 30 sec after completion of the injection, then slowly and gently removed.  
590 The clip was then removed. Intestines were carefully returned to the abdomen, muscle  
591 layer closed with vicryl sutures, and skin closed with sterile suture clips. When performed  
592 together with orthotopic transplantation of PDAC cells, cells were injected after removal  
593 of the syringe and clip.

594

## 595 **Atomic force microscopy**

596 Fresh tumor tissues were placed in the middle of a disposable cryomold and embedded  
597 in Optical Cutting Temperature (OCT) compound. Tissues were sectioned with a cryostat  
598 at a thickness of 50  $\mu\text{m}$  and adhered to positively charged microscope slides. Prior to  
599 measurements, samples were thawed at room temperature in DMEM/F-12 supplemented  
600 with 10% FBS and a protease inhibitor cocktail (Sigma Aldrich 11836170001). Atomic  
601 force microscopy (AFM) measurements were performed with a NanoWizard 4 XP  
602 BioScience with HybridStage (Bruker) mounted on a Zeiss Axio Observer inverted optical  
603 microscope. Dulled triangular silicon nitride ScanAsyst-Fluid probes were used ( $\kappa = 0.7$   
604 N/m; Bruker) at a maximum applied force of 4 nN and approach speed of 5  $\mu\text{m/s}$ . Each  
605 probe was calibrated with the thermal oscillation method prior to measurements on each  
606 tissue. Force curves were analyzed to obtain the Young's modulus using the JPK Data  
607 Processing Software package with the Hertz/Sneddon model assuming an  
608 incompressible tissue and a Poisson's ratio of 0.5 with tip parameters provided by the  
609 manufacturer's specifications. Three independent samples were imaged from each  
610 treatment group at three locations at varying tissue depths with a scan size of 100  $\mu\text{m}^2$   
611 with force measurements spaced every 10  $\mu\text{m}$ .

612

## 613 **Survival analysis of a PSC ECM gene signature**

614 The PSC-derived CAF ECM signature genes (Supplementary Table S1) were defined as  
615 the overlap of the genes annotated in the Reactome Extracellular Matrix Organization  
616 pathway and the upregulated genes in GFP<sup>+</sup> CAFs (FDR < 0.01 and fold change > 1.25)  
617 per our RNA-seq analysis. In the signature survival analysis, 297 samples were collected

618 with survival time from the OHSU Brenden-Colson Center for Pancreatic Care Tempus  
619 dataset. The gene set variation analysis (GSVA) algorithm with the default settings, as  
620 implemented in the GSVA R package (version 1.34.0), was applied to calculate the gene  
621 signature score for each sample. Next, the samples were stratified into two groups based  
622 on the quantile values of the signature scores (upper quartile versus lower quartile).  
623 Survival curves of these two groups of patients were analyzed by Kaplan-Meier method  
624 with statistical significance calculated using the log-rank test. The Kaplan-Meier estimator  
625 and log-rank test were calculated in the survival R package (version 3.2-3).

626

### 627 **Statistical analysis**

628 Statistical analyses were performed using GraphPad PRISM software. Student *t* test was  
629 used to compare two groups to each other. One-way ANOVA was performed when  
630 multiple conditions were compared for one variable. Tukey *post hoc* tests were used after  
631 ANOVA analyses to perform multiple group comparison. Analysis with a p-value < 0.05  
632 was considered statistically significant.

633

### 634 **Data availability**

635 All sequence data from this study have been deposited in the publicly available Gene  
636 Expression Omnibus under accession number GSE143805.

637

### 638 **Acknowledgements**

639 We thank all members of the Sherman lab, Jae Myoung Suh, and Sara Courtneidge for  
640 helpful conceptual input on this work; and Markus Grompe, Hiroyuki Nakai, Shin-Heng

641 Chiou, and Monte Winslow for guidance on the intraductal AAV delivery approach. This  
642 work was supported by the OHSU Molecular Virology Core, Knight BioLibrary (and  
643 particularly by operations supervisor Danielle Galipeau and by Christopher Corless in his  
644 capacity as Chief Medical Officer of the Knight Diagnostic Laboratories), Flow Cytometry  
645 Shared Resource, Massively Parallel Sequencing Shared Resource, Advanced Light  
646 Microscopy Shared Resource, and Histopathology Shared Resource, with core facility  
647 support from the Knight Cancer Institute Cancer Center Support Grant P30 CA069533.  
648 Funding to support this study came from NIH grant T32 GM071338 (to E.H.), and NIH  
649 grant R01 CA250917, DOD Peer Reviewed Cancer Research Program grant W81XWH-  
650 18-1-0437, and a Pew-Stewart Scholar Award (all to M.H.S.).

651

#### 652 **Author contributions**

653 E.H. and M.H.S. conceived the project. E.H. and M.B. managed mouse breeding for the  
654 study, and performed the in vivo experiments. E.H., R.C.C., M.K.O., C.O., S.B., J.M.F.,  
655 A.S., and M.H.S. performed immunohistochemical staining and/or analyzed stained  
656 tissues. C.C.D. performed atomic force microscopy, and analyzed the results and  
657 generated data together with S.R.H. E.H. and C.O. performed cell culture and molecular  
658 biology experiments. W.H. analyzed the RNA-seq data. R.M. provided pathology  
659 assessment of human PDAC samples. D.W.D. provided the human PDAC microarray.  
660 D.S. and Z.X. generated a gene signature from our RNA-seq data and analyzed  
661 prognostic value using human PDAC RNA-seq data. E.H. and M.H.S. wrote the  
662 manuscript with input from all authors.

663

664

## 665 **References**

- 666
- 667 1. Biffi G, Tuveson DA. Diversity and Biology of Cancer-Associated Fibroblasts.  
668 *Physiol Rev.* 2021;101(1):147-76. Epub 2020/05/30. doi: 10.1152/physrev.00048.2019.  
669 PubMed PMID: 32466724; PubMed Central PMCID: PMC7864232.
- 670 2. Helms E, Onate MK, Sherman MH. Fibroblast Heterogeneity in the Pancreatic  
671 Tumor Microenvironment. *Cancer Discov.* 2020;10(5):648-56. Epub 2020/02/06. doi:  
672 10.1158/2159-8290.CD-19-1353. PubMed PMID: 32014869.
- 673 3. Sahai E, Astsaturon I, Cukierman E, DeNardo DG, Egeblad M, Evans RM, et al. A  
674 framework for advancing our understanding of cancer-associated fibroblasts. *Nat Rev*  
675 *Cancer.* 2020;20(3):174-86. Epub 2020/01/26. doi: 10.1038/s41568-019-0238-1.  
676 PubMed PMID: 31980749; PubMed Central PMCID: PMC7046529.
- 677 4. Maitra A, Hruban RH. Pancreatic cancer. *Annu Rev Pathol.* 2008;3:157-88. Epub  
678 2007/11/28. doi: 10.1146/annurev.pathmechdis.3.121806.154305. PubMed PMID:  
679 18039136; PubMed Central PMCID: PMC7046529.
- 680 5. Sousa CM, Biancur DE, Wang X, Halbrook CJ, Sherman MH, Zhang L, et al.  
681 Pancreatic stellate cells support tumour metabolism through autophagic alanine  
682 secretion. *Nature.* 2016;536(7617):479-83. Epub 2016/08/12. doi: 10.1038/nature19084.  
683 PubMed PMID: 27509858; PubMed Central PMCID: PMC5228623.
- 684 6. Sherman MH, Yu RT, Tseng TW, Sousa CM, Liu S, Truitt ML, et al. Stromal cues  
685 regulate the pancreatic cancer epigenome and metabolome. *Proc Natl Acad Sci U S A.*  
686 2017;114(5):1129-34. Epub 2017/01/18. doi: 10.1073/pnas.1620164114. PubMed PMID:  
687 28096419; PubMed Central PMCID: PMC5293019.
- 688 7. Zhu Z, Achreja A, Meurs N, Animasahun O, Owen S, Mittal A, et al. Tumour-  
689 reprogrammed stromal BCAT1 fuels branched-chain ketoacid dependency in stromal-rich  
690 PDAC tumours. *Nat Metab.* 2020;2(8):775-92. Epub 2020/07/23. doi: 10.1038/s42255-  
691 020-0226-5. PubMed PMID: 32694827; PubMed Central PMCID: PMC7438275.
- 692 8. Zhao H, Yang L, Baddour J, Achreja A, Bernard V, Moss T, et al. Tumor  
693 microenvironment derived exosomes pleiotropically modulate cancer cell metabolism.  
694 *Elife.* 2016;5:e10250. Epub 2016/02/28. doi: 10.7554/eLife.10250. PubMed PMID:  
695 26920219; PubMed Central PMCID: PMC4841778.
- 696 9. Zhang Y, Recouvreux MV, Jung M, Galenkamp KMO, Li Y, Zagnitko O, et al.  
697 Macropinocytosis in Cancer-Associated Fibroblasts is Dependent on  
698 CaMKK2/ARHGEF2 Signaling and Functions to Support Tumor and Stromal Cell Fitness.  
699 *Cancer Discov.* 2021. Epub 2021/03/04. doi: 10.1158/2159-8290.CD-20-0119. PubMed  
700 PMID: 33653692.
- 701 10. Francescone R, Barbosa Vendramini-Costa D, Franco-Barraza J, Wagner J, Muir  
702 A, Lau AN, et al. Netrin G1 Promotes Pancreatic Tumorigenesis through Cancer-  
703 Associated Fibroblast-Driven Nutritional Support and Immunosuppression. *Cancer*  
704 *Discov.* 2021;11(2):446-79. Epub 2020/11/01. doi: 10.1158/2159-8290.CD-20-0775.  
705 PubMed PMID: 33127842; PubMed Central PMCID: PMC7858242.
- 706 11. Elyada E, Bolisetty M, Laise P, Flynn WF, Courtois ET, Burkhart RA, et al. Cross-  
707 Species Single-Cell Analysis of Pancreatic Ductal Adenocarcinoma Reveals Antigen-  
708 Presenting Cancer-Associated Fibroblasts. *Cancer Discov.* 2019;9(8):1102-23. Epub  
709 2019/06/15. doi: 10.1158/2159-8290.CD-19-0094. PubMed PMID: 31197017; PubMed  
710 Central PMCID: PMC6727976.

- 711 12. Dominguez CX, Muller S, Keerthivasan S, Koeppen H, Hung J, Gierke S, et al.  
712 Single-Cell RNA Sequencing Reveals Stromal Evolution into LRRC15(+) Myfibroblasts  
713 as a Determinant of Patient Response to Cancer Immunotherapy. *Cancer Discov.*  
714 2020;10(2):232-53. Epub 2019/11/09. doi: 10.1158/2159-8290.CD-19-0644. PubMed  
715 PMID: 31699795.
- 716 13. Zhang Y, Lazarus J, Steele NG, Yan W, Lee HJ, Nwosu ZC, et al. Regulatory T-  
717 cell Depletion Alters the Tumor Microenvironment and Accelerates Pancreatic  
718 Carcinogenesis. *Cancer Discov.* 2020;10(3):422-39. Epub 2020/01/09. doi:  
719 10.1158/2159-8290.CD-19-0958. PubMed PMID: 31911451; PubMed Central PMCID:  
720 PMC7224338.
- 721 14. Feig C, Jones JO, Kraman M, Wells RJ, Deonarine A, Chan DS, et al. Targeting  
722 CXCL12 from FAP-expressing carcinoma-associated fibroblasts synergizes with anti-PD-  
723 L1 immunotherapy in pancreatic cancer. *Proc Natl Acad Sci U S A.* 2013;110(50):20212-  
724 7. Epub 2013/11/28. doi: 10.1073/pnas.1320318110. PubMed PMID: 24277834; PubMed  
725 Central PMCID: PMC3864274.
- 726 15. Ozdemir BC, Pentcheva-Hoang T, Carstens JL, Zheng X, Wu CC, Simpson TR, et  
727 al. Depletion of carcinoma-associated fibroblasts and fibrosis induces  
728 immunosuppression and accelerates pancreas cancer with reduced survival. *Cancer*  
729 *Cell.* 2014;25(6):719-34. Epub 2014/05/27. doi: 10.1016/j.ccr.2014.04.005. PubMed  
730 PMID: 24856586; PubMed Central PMCID: PMC4180632.
- 731 16. Provenzano PP, Cuevas C, Chang AE, Goel VK, Von Hoff DD, Hingorani SR.  
732 Enzymatic targeting of the stroma ablates physical barriers to treatment of pancreatic  
733 ductal adenocarcinoma. *Cancer Cell.* 2012;21(3):418-29. Epub 2012/03/24. doi:  
734 10.1016/j.ccr.2012.01.007. PubMed PMID: 22439937; PubMed Central PMCID:  
735 PMC3371414.
- 736 17. Jacobetz MA, Chan DS, Neesse A, Bapiro TE, Cook N, Frese KK, et al.  
737 Hyaluronan impairs vascular function and drug delivery in a mouse model of pancreatic  
738 cancer. *Gut.* 2013;62(1):112-20. Epub 2012/04/03. doi: 10.1136/gutjnl-2012-302529.  
739 PubMed PMID: 22466618; PubMed Central PMCID: PMC3551211.
- 740 18. Laklai H, Miroshnikova YA, Pickup MW, Collisson EA, Kim GE, Barrett AS, et al.  
741 Genotype tunes pancreatic ductal adenocarcinoma tissue tension to induce matricellular  
742 fibrosis and tumor progression. *Nat Med.* 2016;22(5):497-505. Epub 2016/04/19. doi:  
743 10.1038/nm.4082. PubMed PMID: 27089513; PubMed Central PMCID:  
744 PMC4860133.
- 745 19. Olive KP, Jacobetz MA, Davidson CJ, Gopinathan A, McIntyre D, Honess D, et al.  
746 Inhibition of Hedgehog signaling enhances delivery of chemotherapy in a mouse model  
747 of pancreatic cancer. *Science.* 2009;324(5933):1457-61. Epub 2009/05/23. doi:  
748 10.1126/science.1171362. PubMed PMID: 19460966; PubMed Central PMCID:  
749 PMC2998180.
- 750 20. Steele NG, Biffi G, Kemp SB, Zhang Y, Drouillard D, Syu L, et al. Inhibition of  
751 Hedgehog Signaling Alters Fibroblast Composition in Pancreatic Cancer. *Clin Cancer*  
752 *Res.* 2021. Epub 2021/01/27. doi: 10.1158/1078-0432.CCR-20-3715. PubMed PMID:  
753 33495315.
- 754 21. Biasci D, Smoragiewicz M, Connell CM, Wang Z, Gao Y, Thaventhiran JED, et al.  
755 CXCR4 inhibition in human pancreatic and colorectal cancers induces an integrated  
756 immune response. *Proc Natl Acad Sci U S A.* 2020;117(46):28960-70. Epub 2020/11/01.

- 757 doi: 10.1073/pnas.2013644117. PubMed PMID: 33127761; PubMed Central PMCID:  
758 PMCPMC7682333.
- 759 22. Van Cutsem E, Tempero MA, Sigal D, Oh DY, Fazio N, Macarulla T, et al.  
760 Randomized Phase III Trial of Pegvorhialuronidase Alfa With Nab-Paclitaxel Plus  
761 Gemcitabine for Patients With Hyaluronan-High Metastatic Pancreatic Adenocarcinoma.  
762 *J Clin Oncol.* 2020;38(27):3185-94. Epub 2020/07/25. doi: 10.1200/JCO.20.00590.  
763 PubMed PMID: 32706635; PubMed Central PMCID: PMCPMC7499614.
- 764 23. Rhim AD, Oberstein PE, Thomas DH, Mirek ET, Palermo CF, Sastra SA, et al.  
765 Stromal elements act to restrain, rather than support, pancreatic ductal adenocarcinoma.  
766 *Cancer Cell.* 2014;25(6):735-47. Epub 2014/05/27. doi: 10.1016/j.ccr.2014.04.021.  
767 PubMed PMID: 24856585; PubMed Central PMCID: PMCPMC4096698.
- 768 24. Lee JJ, Perera RM, Wang H, Wu DC, Liu XS, Han S, et al. Stromal response to  
769 Hedgehog signaling restrains pancreatic cancer progression. *Proc Natl Acad Sci U S A.*  
770 2014;111(30):E3091-100. Epub 2014/07/16. doi: 10.1073/pnas.1411679111. PubMed  
771 PMID: 25024225; PubMed Central PMCID: PMCPMC4121834.
- 772 25. Chen Y, Kim J, Yang S, Wang H, Wu CJ, Sugimoto H, et al. Type I collagen  
773 deletion in alphaSMA(+) myofibroblasts augments immune suppression and accelerates  
774 progression of pancreatic cancer. *Cancer Cell.* 2021. Epub 2021/03/06. doi:  
775 10.1016/j.ccell.2021.02.007. PubMed PMID: 33667385.
- 776 26. Jiang H, Torphy RJ, Steiger K, Hongo H, Ritchie AJ, Kriegsmann M, et al.  
777 Pancreatic ductal adenocarcinoma progression is restrained by stromal matrix. *J Clin*  
778 *Invest.* 2020;130(9):4704-9. Epub 2020/08/05. doi: 10.1172/JCI136760. PubMed PMID:  
779 32749238; PubMed Central PMCID: PMCPMC7456216.
- 780 27. Torphy RJ, Wang Z, True-Yasaki A, Volmar KE, Rashid N, Yeh B, et al. Stromal  
781 Content Is Correlated With Tissue Site, Contrast Retention, and Survival in Pancreatic  
782 Adenocarcinoma. *JCO Precis Oncol.* 2018;2018. Epub 2018/12/07. doi:  
783 10.1200/PO.17.00121. PubMed PMID: 30506016; PubMed Central PMCID:  
784 PMCPMC6262879.
- 785 28. Ohlund D, Handly-Santana A, Biffi G, Elyada E, Almeida AS, Ponz-Sarvise M, et  
786 al. Distinct populations of inflammatory fibroblasts and myofibroblasts in pancreatic  
787 cancer. *J Exp Med.* 2017;214(3):579-96. Epub 2017/02/25. doi: 10.1084/jem.20162024.  
788 PubMed PMID: 28232471; PubMed Central PMCID: PMCPMC5339682.
- 789 29. Hosein AN, Huang H, Wang Z, Parmar K, Du W, Huang J, et al. Cellular  
790 heterogeneity during mouse pancreatic ductal adenocarcinoma progression at single-cell  
791 resolution. *JCI Insight.* 2019;5. Epub 2019/07/25. doi: 10.1172/jci.insight.129212.  
792 PubMed PMID: 31335328; PubMed Central PMCID: PMCPMC6777805.
- 793 30. Neuzillet C, Tijeras-Raballand A, Ragulan C, Cros J, Patil Y, Martinet M, et al.  
794 Inter- and intra-tumoural heterogeneity in cancer-associated fibroblasts of human  
795 pancreatic ductal adenocarcinoma. *J Pathol.* 2019;248(1):51-65. Epub 2018/12/24. doi:  
796 10.1002/path.5224. PubMed PMID: 30575030; PubMed Central PMCID:  
797 PMCPMC6492001.
- 798 31. Erkan M, Adler G, Apte MV, Bachem MG, Buchholz M, Detlefsen S, et al.  
799 StellaTUM: current consensus and discussion on pancreatic stellate cell research. *Gut.*  
800 2012;61(2):172-8. Epub 2011/11/26. doi: 10.1136/gutjnl-2011-301220. PubMed PMID:  
801 22115911; PubMed Central PMCID: PMCPMC3245897.

- 802 32. Apte MV, Park S, Phillips PA, Santucci N, Goldstein D, Kumar RK, et al.  
803 Desmoplastic reaction in pancreatic cancer: role of pancreatic stellate cells. *Pancreas*.  
804 2004;29(3):179-87. Epub 2004/09/16. doi: 10.1097/00006676-200410000-00002.  
805 PubMed PMID: 15367883.
- 806 33. Sherman MH. Stellate Cells in Tissue Repair, Inflammation, and Cancer. *Annu*  
807 *Rev Cell Dev Biol*. 2018;34:333-55. Epub 2018/07/22. doi: 10.1146/annurev-cellbio-  
808 100617-062855. PubMed PMID: 30028641.
- 809 34. Riopel MM, Li J, Liu S, Leask A, Wang R. beta1 integrin-extracellular matrix  
810 interactions are essential for maintaining exocrine pancreas architecture and function.  
811 *Lab Invest*. 2013;93(1):31-40. Epub 2012/10/17. doi: 10.1038/labinvest.2012.147.  
812 PubMed PMID: 23069938.
- 813 35. Biffi G, Oni TE, Spielman B, Hao Y, Elyada E, Park Y, et al. IL1-Induced JAK/STAT  
814 Signaling Is Antagonized by TGFbeta to Shape CAF Heterogeneity in Pancreatic Ductal  
815 Adenocarcinoma. *Cancer Discov*. 2019;9(2):282-301. Epub 2018/10/28. doi:  
816 10.1158/2159-8290.CD-18-0710. PubMed PMID: 30366930; PubMed Central PMCID:  
817 PMC6368881.
- 818 36. Sherman MH, Yu RT, Engle DD, Ding N, Atkins AR, Tiriack H, et al. Vitamin D  
819 receptor-mediated stromal reprogramming suppresses pancreatitis and enhances  
820 pancreatic cancer therapy. *Cell*. 2014;159(1):80-93. Epub 2014/09/27. doi:  
821 10.1016/j.cell.2014.08.007. PubMed PMID: 25259922; PubMed Central PMCID:  
822 PMC4177038.
- 823 37. He W, Barak Y, Hevener A, Olson P, Liao D, Le J, et al. Adipose-specific  
824 peroxisome proliferator-activated receptor gamma knockout causes insulin resistance in  
825 fat and liver but not in muscle. *Proc Natl Acad Sci U S A*. 2003;100(26):15712-7. Epub  
826 2003/12/09. doi: 10.1073/pnas.2536828100. PubMed PMID: 14660788; PubMed Central  
827 PMCID: PMC307633.
- 828 38. Muzumdar MD, Tasic B, Miyamichi K, Li L, Luo L. A global double-fluorescent Cre  
829 reporter mouse. *Genesis*. 2007;45(9):593-605. Epub 2007/09/18. doi:  
830 10.1002/dvg.20335. PubMed PMID: 17868096.
- 831 39. Apte MV, Haber PS, Applegate TL, Norton ID, McCaughan GW, Korsten MA, et  
832 al. Periampullar stellate shaped cells in rat pancreas: identification, isolation, and culture.  
833 *Gut*. 1998;43(1):128-33. Epub 1998/10/15. doi: 10.1136/gut.43.1.128. PubMed PMID:  
834 9771417; PubMed Central PMCID: PMC1727174.
- 835 40. Bachem MG, Schneider E, Gross H, Weidenbach H, Schmid RM, Menke A, et al.  
836 Identification, culture, and characterization of pancreatic stellate cells in rats and humans.  
837 *Gastroenterology*. 1998;115(2):421-32. Epub 1998/07/25. doi: 10.1016/s0016-  
838 5085(98)70209-4. PubMed PMID: 9679048.
- 839 41. Mederacke I, Hsu CC, Troeger JS, Huebener P, Mu X, Dapito DH, et al. Fate  
840 tracing reveals hepatic stellate cells as dominant contributors to liver fibrosis independent  
841 of its aetiology. *Nat Commun*. 2013;4:2823. Epub 2013/11/23. doi:  
842 10.1038/ncomms3823. PubMed PMID: 24264436; PubMed Central PMCID:  
843 PMC4059406.
- 844 42. Iwaisako K, Jiang C, Zhang M, Cong M, Moore-Morris TJ, Park TJ, et al. Origin of  
845 myofibroblasts in the fibrotic liver in mice. *Proc Natl Acad Sci U S A*. 2014;111(32):E3297-  
846 305. Epub 2014/07/31. doi: 10.1073/pnas.1400062111. PubMed PMID: 25074909;  
847 PubMed Central PMCID: PMC4136601.



- 848 43. Vennin C, Melenec P, Rouet R, Nobis M, Cazet AS, Murphy KJ, et al. CAF  
849 hierarchy driven by pancreatic cancer cell p53-status creates a pro-metastatic and  
850 chemoresistant environment via perlecan. *Nat Commun.* 2019;10(1):3637. Epub  
851 2019/08/14. doi: 10.1038/s41467-019-10968-6. PubMed PMID: 31406163; PubMed  
852 Central PMCID: PMC6691013.
- 853 44. Buch T, Heppner FL, Tertilt C, Heinen TJ, Kremer M, Wunderlich FT, et al. A Cre-  
854 inducible diphtheria toxin receptor mediates cell lineage ablation after toxin  
855 administration. *Nat Methods.* 2005;2(6):419-26. Epub 2005/05/24. doi:  
856 10.1038/nmeth762. PubMed PMID: 15908920.
- 857 45. Chiou SH, Winters IP, Wang J, Naranjo S, Dudgeon C, Tamburini FB, et al.  
858 Pancreatic cancer modeling using retrograde viral vector delivery and in vivo  
859 CRISPR/Cas9-mediated somatic genome editing. *Genes Dev.* 2015;29(14):1576-85.  
860 Epub 2015/07/17. doi: 10.1101/gad.264861.115. PubMed PMID: 26178787; PubMed  
861 Central PMCID: PMC64526740.
- 862 46. Wang Y, Dorrell C, Naugler WE, Heskett M, Spellman P, Li B, et al. Long-Term  
863 Correction of Diabetes in Mice by In Vivo Reprogramming of Pancreatic Ducts. *Mol Ther.*  
864 2018;26(5):1327-42. Epub 2018/03/20. doi: 10.1016/j.ymthe.2018.02.014. PubMed  
865 PMID: 29550076; PubMed Central PMCID: PMC5993989.
- 866 47. Rice AJ, Cortes E, Lachowski D, Cheung BCH, Karim SA, Morton JP, et al. Matrix  
867 stiffness induces epithelial-mesenchymal transition and promotes chemoresistance in  
868 pancreatic cancer cells. *Oncogenesis.* 2017;6(7):e352. Epub 2017/07/04. doi:  
869 10.1038/oncsis.2017.54. PubMed PMID: 28671675; PubMed Central PMCID:  
870 PMC5541706.
- 871 48. Fukuda A, Wang SC, Morris JPt, Folias AE, Liou A, Kim GE, et al. Stat3 and MMP7  
872 contribute to pancreatic ductal adenocarcinoma initiation and progression. *Cancer Cell.*  
873 2011;19(4):441-55. Epub 2011/04/13. doi: 10.1016/j.ccr.2011.03.002. PubMed PMID:  
874 21481787; PubMed Central PMCID: PMC3075548.
- 875 49. Lesina M, Kurkowski MU, Ludes K, Rose-John S, Treiber M, Kloppel G, et al.  
876 Stat3/Socs3 activation by IL-6 transsignaling promotes progression of pancreatic  
877 intraepithelial neoplasia and development of pancreatic cancer. *Cancer Cell.*  
878 2011;19(4):456-69. Epub 2011/04/13. doi: 10.1016/j.ccr.2011.03.009. PubMed PMID:  
879 21481788.
- 880 50. Jiang H, Hegde S, Knolhoff BL, Zhu Y, Herndon JM, Meyer MA, et al. Targeting  
881 focal adhesion kinase renders pancreatic cancers responsive to checkpoint  
882 immunotherapy. *Nat Med.* 2016;22(8):851-60. Epub 2016/07/05. doi: 10.1038/nm.4123.  
883 PubMed PMID: 27376576; PubMed Central PMCID: PMC4935930.
- 884 51. Raz Y, Cohen N, Shani O, Bell RE, Novitskiy SV, Abramovitz L, et al. Bone  
885 marrow-derived fibroblasts are a functionally distinct stromal cell population in breast  
886 cancer. *J Exp Med.* 2018;215(12):3075-93. Epub 2018/11/25. doi:  
887 10.1084/jem.20180818. PubMed PMID: 30470719; PubMed Central PMCID:  
888 PMC6279405.
- 889 52. Garcia PE, Adoumie M, Kim EC, Zhang Y, Scales MK, El-Tawil YS, et al.  
890 Differential Contribution of Pancreatic Fibroblast Subsets to the Pancreatic Cancer  
891 Stroma. *Cell Mol Gastroenterol Hepatol.* 2020;10(3):581-99. Epub 2020/05/27. doi:  
892 10.1016/j.jcmgh.2020.05.004. PubMed PMID: 32454112; PubMed Central PMCID:  
893 PMC7399194.

894 53. Manuyakorn A, Paulus R, Farrell J, Dawson NA, Tze S, Cheung-Lau G, et al.  
895 Cellular histone modification patterns predict prognosis and treatment response in  
896 resectable pancreatic adenocarcinoma: results from RTOG 9704. *J Clin Oncol.*  
897 2010;28(8):1358-65. Epub 2010/02/10. doi: 10.1200/JCO.2009.24.5639. PubMed PMID:  
898 20142597; PubMed Central PMCID: PMCPMC2834495.

899 54. Auciello FR, Bulusu V, Oon C, Tait-Mulder J, Berry M, Bhattacharyya S, et al. A  
900 Stromal Lysolipid-Autotaxin Signaling Axis Promotes Pancreatic Tumor Progression.  
901 *Cancer Discov.* 2019;9(5):617-27. Epub 2019/03/07. doi: 10.1158/2159-8290.CD-18-  
902 1212. PubMed PMID: 30837243; PubMed Central PMCID: PMCPMC6497553.

903  
904

## 905 **Figure legends**

906

907 **Figure 1. *Fabp4*-Cre marks stellate cells specifically and pervasively within normal**  
908 **pancreas tissue.**

909 **(A)** Schematic of the alleles used to label and track PSCs *in vivo*. **(B)** Representative  
910 image of normal pancreas tissue from *Fabp4-Cre;Rosa26<sup>mTmG</sup>* mice (n = 7) showing rare  
911 GFP<sup>+</sup> cells within a predominantly tdTomato<sup>+</sup> tissue. Scale bar = 50 μm. **(C)**  
912 Representative image of normal pancreas tissue from *Fabp4-Cre;Rosa26<sup>mTmG</sup>* mice (n =  
913 3) showing CD31<sup>+</sup> endothelial cells and GFP<sup>+</sup> cells, some of which are adjacent to  
914 vessels. Scale bar = 50 μm. **(D)** Representative image of normal pancreas tissue from  
915 *Fabp4-Cre;Rosa26<sup>mTmG</sup>* mice (n = 3) showing CD45<sup>+</sup> leukocytes and GFP<sup>+</sup> cells. Scale  
916 bar = 10 μm. **(E)** Representative image of normal pancreas tissue from *Fabp4-*  
917 *Cre;Rosa26<sup>mTmG</sup>* mice (n = 3) showing NG2<sup>+</sup> pericytes and GFP<sup>+</sup> cells. Scale bar = 50  
918 μm. **(F)** qPCR for the indicated genes in GFP<sup>+</sup> and tdTomato<sup>+</sup> cells isolated from normal  
919 pancreas tissue from *Fabp4-Cre;Rosa26<sup>mTmG</sup>* mice by FACS (n = 3, with each replicate  
920 pooled from 2 mice), including markers of pericytes (*Cspg4*; liver is a positive control),  
921 stellate cells and potentially other mesenchymal cells (*Des*), ductal cells (*Krt19*),

922 mesenchymal cells (*Vim*), acinar cells (*Prss3*), and beta cells (*Ins1*); *Fabp4* was included  
923 as a control. Data were normalized to *36b4* and are presented as mean  $\pm$  SEM. **(G)**  
924 Quantification of GFP<sup>+</sup> cells and tdTomato<sup>+</sup> cells out of total, Desmin<sup>+</sup> PSCs isolated by  
925 density centrifugation from normal pancreas tissue in *Fabp4-Cre;Rosa26<sup>mTmG</sup>* mice (n =  
926 3) and analyzed by immunofluorescence microscopy. Data are presented as mean  $\pm$   
927 SEM. **(H)** Flow cytometry results depicting GFP<sup>+</sup> and tdTomato<sup>+</sup> cells among all vitamin  
928 A<sup>+</sup> PSCs in normal pancreas tissue from *Fabp4-Cre;Rosa26<sup>mTmG</sup>* mice (n = 3). Data are  
929 presented as mean  $\pm$  SEM.

930

931 **Figure 2. Stellate cells give rise to a numerically minor subset of PDAC CAFs.**

932 **(A)** Immunohistochemical staining of PDAC (KPC 4662) in *Fabp4-Cre;Rosa26<sup>mTmG</sup>* hosts  
933 (n = 5), with GFP in green and panCK (tumor cells) in red. Scale bar = 50  $\mu$ m. **(B)**  
934 Immunohistochemical staining of PDAC (KPC FC1199) in *Fabp4-Cre;Rosa26<sup>mTmG</sup>* hosts  
935 (n = 3), stained for GFP, PDPN, and  $\alpha$ -SMA. Scale bar = 10  $\mu$ m. **(C)**  
936 Immunohistochemical staining of PDAC (KP<sup>flox/+</sup>C HY2910) in *Fabp4-Cre;Rosa26<sup>mTmG</sup>*  
937 hosts (n = 3), stained for GFP, PDPN, and  $\alpha$ -SMA. Scale bar = 10  $\mu$ m. **(D)** Flow cytometry  
938 analysis of PDGFR $\alpha$ , GFP, and tdTomato in KPC 4662 tumors in *Fabp4-Cre;Rosa26<sup>mTmG</sup>*  
939 hosts (n = 5). Data are presented as mean  $\pm$  SEM. **(E)** Flow cytometry analysis of PDPN,  
940 GFP, and tdTomato in KPC FC1199 tumors in *Fabp4-Cre;Rosa26<sup>mTmG</sup>* hosts (n = 8). Data  
941 are presented as mean  $\pm$  SEM. **(F)** Flow cytometry analysis of PDPN, GFP, and tdTomato  
942 in KPC 4662 tumors in *Fabp4-Cre;Rosa26<sup>mTmG</sup>* hosts (n = 3). Data are presented as mean  
943  $\pm$  SEM.

944

945 **Figure 3. Mesenchymal lineage heterogeneity gives rise to transcriptional**  
946 **heterogeneity among PDAC CAFs.**

947 **(A)** Heatmap depicting differentially expressed genes in PSC-derived (GFP<sup>+</sup>) versus non-  
948 PSC-derived (tdTomato<sup>+</sup>) CAFs from KPC FC1199 PDAC in *Fabp4-Cre;Rosa26<sup>mTmG</sup>*  
949 hosts (n = 3), identified by RNA-seq. **(B)** Gene ontology analysis identifying the top terms  
950 enriched in association with genes upregulated at least 2-fold in PSC-derived CAFs  
951 compared to non-PSC-derived CAFs. **(C)** qPCR for the indicated genes on PSC-derived  
952 and non-PSC-derived CAFs sorted from KPC FC1199 PDAC in *Fabp4-Cre;Rosa26<sup>mTmG</sup>*  
953 hosts (n = 3) by FACS. Data were normalized to *36b4* and are presented as mean ± SEM.  
954 **(D)** Representative immunohistochemical staining of human PDAC for TIE1 and α-SMA  
955 (n = 5). Scale bar = 50 μm. **(E)** Representative images from a human PDAC microarray  
956 after immunohistochemical staining for TIE1 and α-SMA (n = 153). **(F)** Quantification of  
957 TIE1<sup>+</sup>α-SMA<sup>+</sup> area out of total α-SMA<sup>+</sup> area on each patient sample from the array.  
958 Different regions from the same patient were averaged together to yield one frequency  
959 per patient sample (4 punches per patient, 612 total tumor regions analyzed, 153 plotted  
960 here after averaging for each patient). **(G)** Quantification of TIE1<sup>+</sup>α-SMA<sup>+</sup> area out of total  
961 α-SMA<sup>+</sup> area using whole PDAC tissue sections (n = 43) from an independent patient  
962 cohort from that depicted in E & F.

963

964 **Figure 4. Targeted ablation reveals unique roles for PSC-derived CAFs in regulation**  
965 **of the extracellular matrix and mechanosignaling.**

966 **(A)** Immunohistochemical staining and quantification of GFP<sup>+</sup> cells in normal pancreas  
967 tissue from *Fabp4-Cre;Rosa26<sup>mTmG</sup>* mice and from *Rosa26<sup>mTmG/iDTR</sup>* mice 7 days after

968 intraductal injection with AAVKP1-Fabp4-Cre (n = 5). Data are presented as mean  $\pm$  SEM.  
969 Scale bar = 50  $\mu$ m. **(B)** Schematic of tumor modeling using intraductal injection of  
970 AAVKP1-Fabp4-Cre and orthotopic transplantation of KPC PDAC cells into  
971 *Rosa26<sup>mTmG/iDTR</sup>* hosts. **(C)** Immunohistochemical staining for GFP, PDPN, and  $\alpha$ -SMA of  
972 KPC FC1199 PDAC in *Rosa26<sup>mTmG/iDTR</sup>* hosts with intraductal injection of AAVKP1-  
973 Fabp4-Cre, enrolled when tumors reached 5-6 mm in diameter and treated with PBS or  
974 DT for 5 days (n = 4). Scale bar = 20  $\mu$ m. **(D)** Immunohistochemical staining for TNC of  
975 KPC FC1199 PDAC in AAVKP1-Fabp4-Cre-injected *Rosa26<sup>mTmG/iDTR</sup>* hosts, enrolled at  
976 5-6 mm in tumor diameter and treated with PBS or DT for 5 days (n = 3). Scale bar = 50  
977  $\mu$ m. **(E)** Immunohistochemical staining for p-MLC2 of PDAC samples as described in D.  
978 Scale bar = 50  $\mu$ m. **(F)** Force maps generated by atomic force microscopy on KPC  
979 FC1199 PDAC in AAVKP1-Fabp4-Cre-injected *Rosa26<sup>mTmG/iDTR</sup>* hosts (n = 3 per  
980 treatment group, control: 1063 data points, depleted: 717 data points), excised after 5  
981 days of treatment with PBS or DT. **(G)** Quantification of Young's modulus per AFM  
982 measurements on control and PSC-depleted PDAC as described in F. The dashed line  
983 on the graph on the right denotes the approximate stiffness of normal murine pancreas  
984 tissue. \*\*\*\*p < 0.0001 by unpaired t-test. **(H)** Immunohistochemical staining for p-STAT3  
985 (Y705) of control and PSC-depleted PDAC harvested after 5 days of depletion (n = 3).  
986 Scale bar = 50  $\mu$ m. **(I)** Kaplan-Meier plot depicting overall survival of PDAC patients with  
987 high versus low expression of a PSC-derived CAF ECM gene signature comprised of 99  
988 genes (see Methods), plotting the upper versus lower quartile (n = 73 per arm).  
989

990 **Figure 5. Tumor genotype with respect to p53 status influences stromal**  
991 **evolutionary routes.**

992 **(A)** Flow cytometry analysis of PDPN<sup>+</sup> cells in size-matched KPC FC1199 (p53 R172H,  
993 n = 8) and HY2910 (p53-null, n = 7) PDAC in *Fabp4-Cre;Rosa26<sup>mTmG</sup>* hosts. Data are  
994 presented as mean ± SEM. **(B)** Flow cytometry analysis of PDPN, GFP, and tdTomato in  
995 the tumors described in A to quantify the percent of CAFs derived from PSCs. Data are  
996 presented as mean ± SEM. **(C)** Immunohistochemical staining for GFP and PDPN on  
997 KPC FC1199 and HY2910 PDAC in *Fabp4-Cre;Rosa26<sup>mTmG</sup>* hosts (n = 3). Scale bar =  
998 10 μm. **(D)** Western blots for p53 and HSC70 (loading control) using whole cell lysates  
999 from parental KPC FC1245 (p53 R172H) cells or derivative lines transfected with control  
1000 plasmid or 1 of 2 sgTrp53 sequences. **(E)** Flow cytometry analysis of PDPN, GFP, and  
1001 tdTomato in size-matched control (n = 4) and sgTrp53 (n = 3 per line) PDAC in *Fabp4-*  
1002 *Cre;Rosa26<sup>mTmG</sup>* hosts. Data are presented as mean ± SEM. \*p < 0.05 by one-way  
1003 ANOVA. **(F)** Immunohistochemical staining for p-MLC2 in size-matched control and  
1004 sgTrp53 PDAC in *Fabp4-Cre;Rosa26<sup>mTmG</sup>* hosts (n = 3). Scale bar = 100 μm. \*p < 0.05  
1005 by one-way ANOVA.

1006

1007 **Figure S1, related to Figure 1.**

1008 **(A)** Flow cytometry analysis of CD31, GFP, and tdTomato on normal pancreas tissue  
1009 from *Fabp4-Cre;Rosa26<sup>mTmG</sup>* mice (n = 3). Data are presented as mean ± SEM. **(B)**  
1010 Representative flow cytometry plot showing GFP<sup>+</sup> and tdTomato<sup>+</sup> populations in normal  
1011 pancreas from *Fabp4-Cre;Rosa26<sup>mTmG</sup>* mice used for FACS. **(C)** Immunofluorescence  
1012 staining for Desmin and GFP on PSCs isolated from *Fabp4-Cre;Rosa26<sup>mTmG</sup>* mice by

1013 density centrifugation. Scale bar = 10  $\mu\text{m}$ . **(D)** Representative flow cytometry plot showing  
1014 vitamin A<sup>+</sup> cells in normal pancreas from *Fabp4-Cre;Rosa26<sup>mTmG</sup>* mice.

1015

1016 **Figure S2, related to Figure 3.**

1017 **(A)** Immunohistochemical staining for TIE1 and  $\alpha$ -SMA in KPC FC1199 PDAC in *Fabp4-*  
1018 *Cre;Rosa26<sup>mTmG</sup>* mice (n = 3). Scale bar = 50  $\mu\text{m}$ . **(B)** Representative  
1019 immunohistochemical staining of human PDAC tissue sections (n = 43) for TIE1 and  $\alpha$ -  
1020 SMA. Scale bar = 100  $\mu\text{m}$ .

1021

1022 **Figure S3, related to Figure 4.**

1023 **(A)** Flow cytometry analysis of CD45 and GFP in KPC FC1199 PDAC in *Fabp4-*  
1024 *Cre;Rosa26<sup>mTmG</sup>* mice (n = 4). Data are presented as mean  $\pm$  SEM. **(B)** Flow cytometry  
1025 analysis of CD45, GFP, and tdTomato in KPC FC1199 PDAC in *Rosa26<sup>mTmG/iDTR</sup>* mice  
1026 transduced with intraductal AAVKP1-Fabp4-Cre (n = 3). Data are presented as mean  $\pm$   
1027 SEM. **(C)** Immunohistochemical staining for TNC in KPC FC1245 PDAC in  
1028 *Rosa26<sup>mTmG/iDTR</sup>* mice transduced with intraductal AAVKP1-Fabp4-Cre and treated with  
1029 PBS or DT for 5 days (n = 3). Scale bar = 10  $\mu\text{m}$ . Data are presented as mean  $\pm$  SEM. \*p  
1030 < 0.05 by unpaired t-test. **(D)** Trichrome staining and quantification of aniline blue signal  
1031 (collagens) of KPC FC1199 PDAC in AAVKP1-Fabp4-Cre-injected *Rosa26<sup>mTmG/iDTR</sup>*  
1032 hosts, enrolled at 5-6 mm in tumor diameter and treated with PBS or DT for 5 days (n =  
1033 5). Scale bar = 50  $\mu\text{m}$ .

bioRxiv preprint doi: <https://doi.org/10.1101/2021.05.01.442252>; this version posted May 2, 2021. The copyright holder for this preprint (which was not certified by peer review) is the author/funder, who has granted bioRxiv a license to display the preprint in perpetuity. It is made available under aCC-BY-NC-ND 4.0 International license.

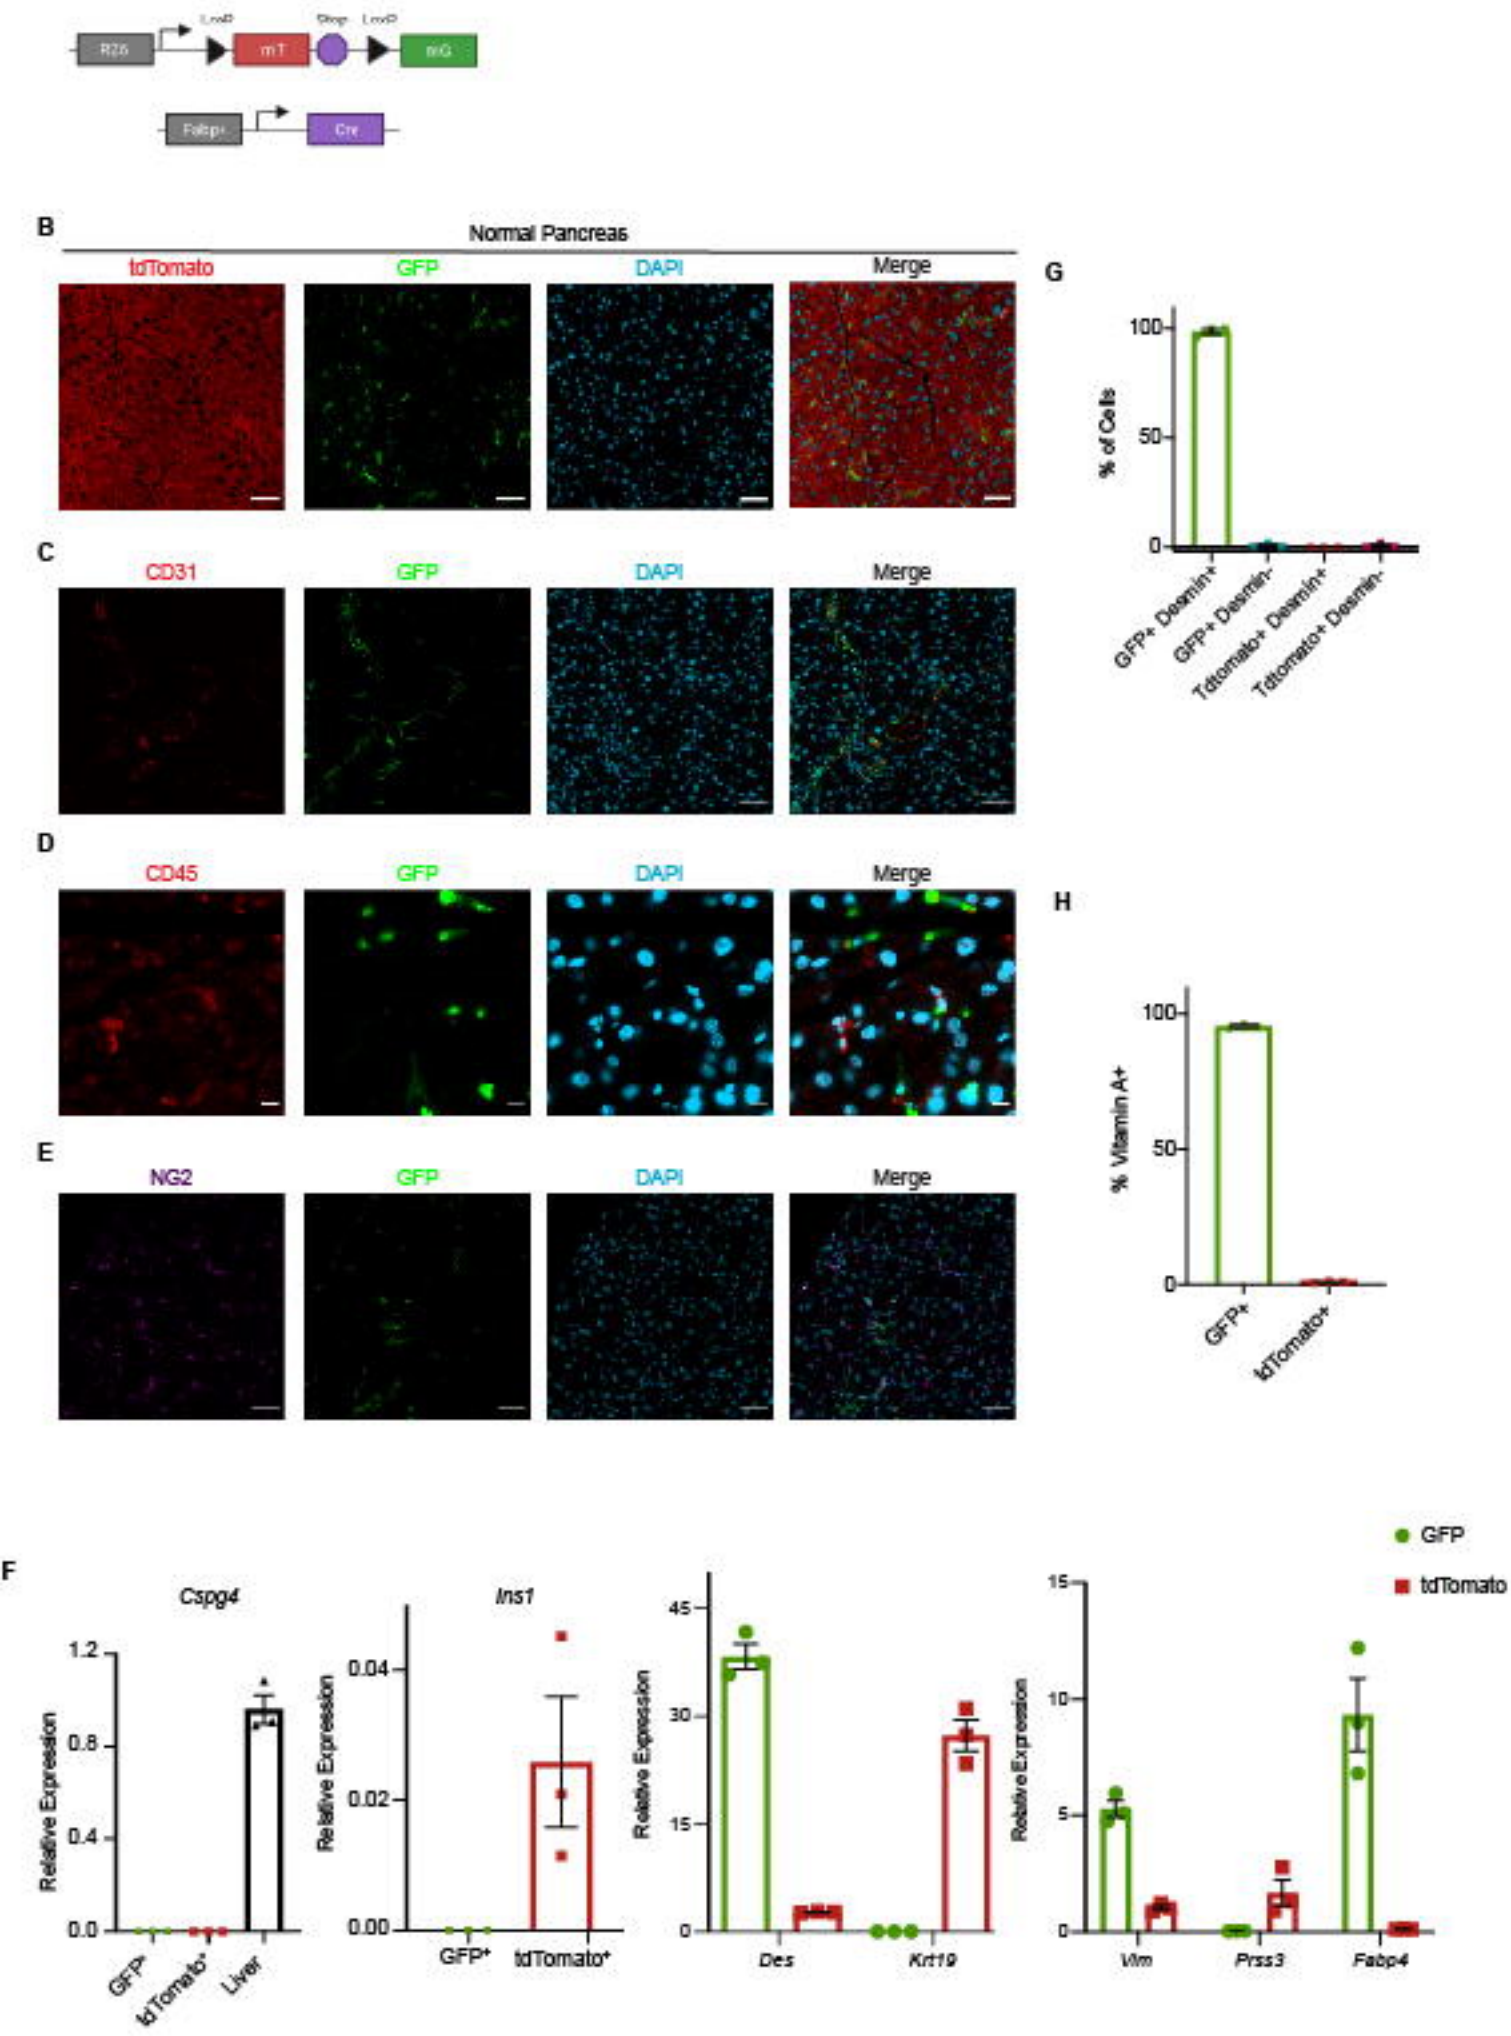



A *Kras<sup>LSL-G12D</sup>;Trp53<sup>LSL-R175H</sup>;Pdx1-Cre (KPC 4002)*  
 bioRxiv preprint doi: <https://doi.org/10.1101/2021.05.01.442252>; this version posted May 2, 2021. The copyright holder for this preprint (which was not certified by peer review) is the author/funder, who has granted bioRxiv a license to display the preprint in perpetuity. It is made available under aCC-BY-NC-ND 4.0 International license.

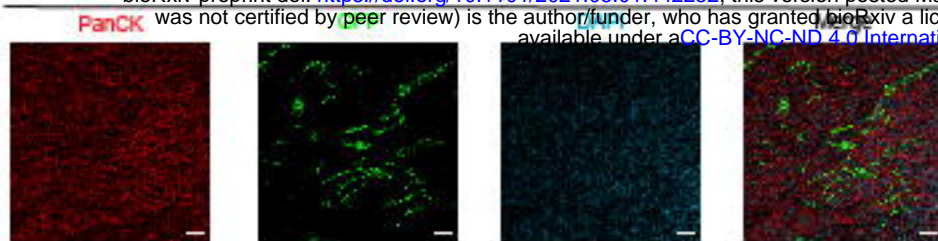

*Kras<sup>LSL-G12D</sup>;Trp53<sup>LSL-R175H</sup>;Pdx1-Cre (KPC FC1100)*

B

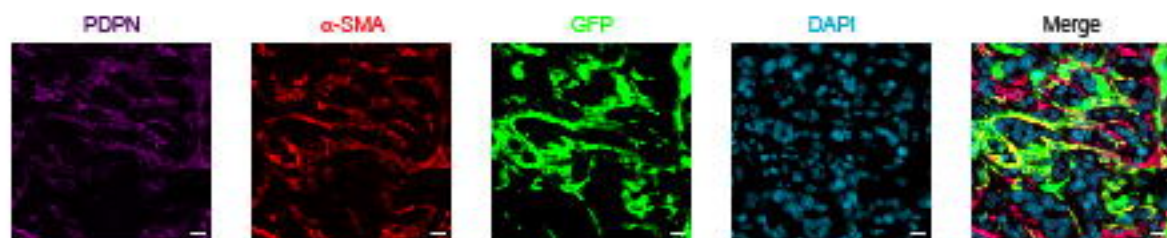

*Kras<sup>LSL-G12D</sup>;Trp53<sup>Lox/Lox</sup>;Pdx1-Cre (KP HY2010)*

C

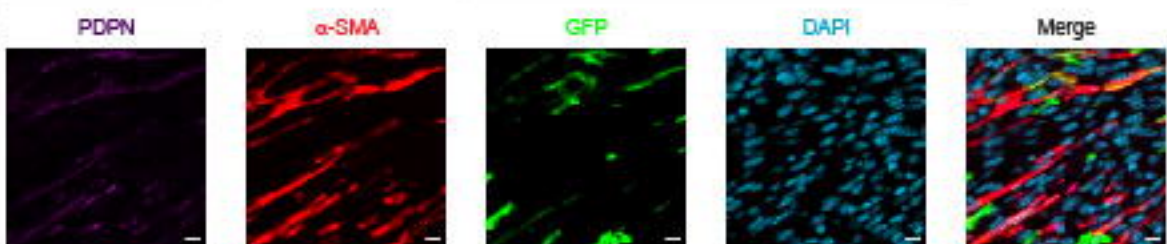

D

*Kras<sup>LSL-G12D</sup>;Trp53<sup>Lox/Lox</sup>;Pdx1-Cre (KPC 4002)*

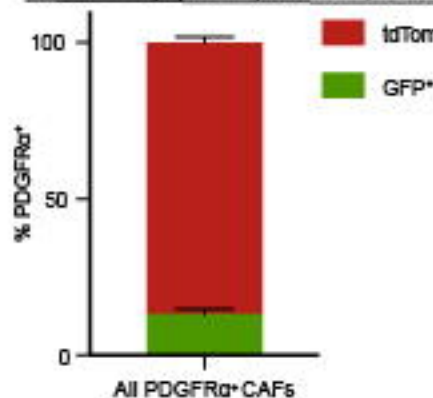

E

*Kras<sup>LSL-G12D</sup>;Trp53<sup>LSL-R175H</sup>;Pdx1-Cre (KPC FC1100)*

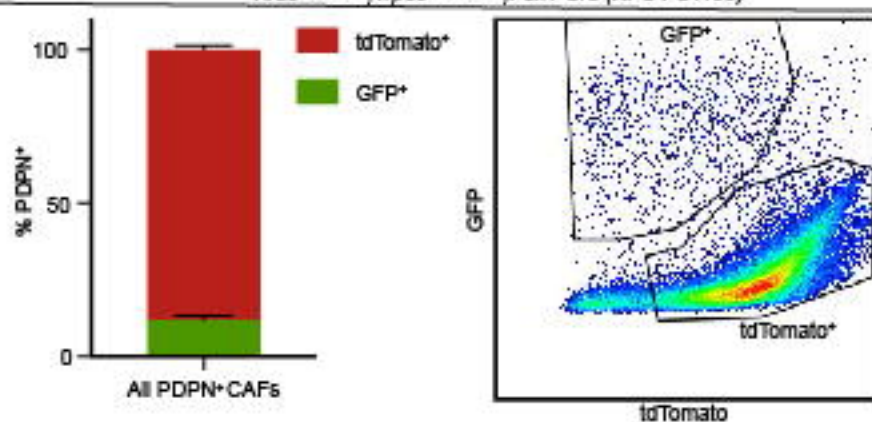

F

*Kras<sup>LSL-G12D</sup>;Trp53<sup>LSL-R175H</sup>;Pdx1-Cre (KPC 4002)*

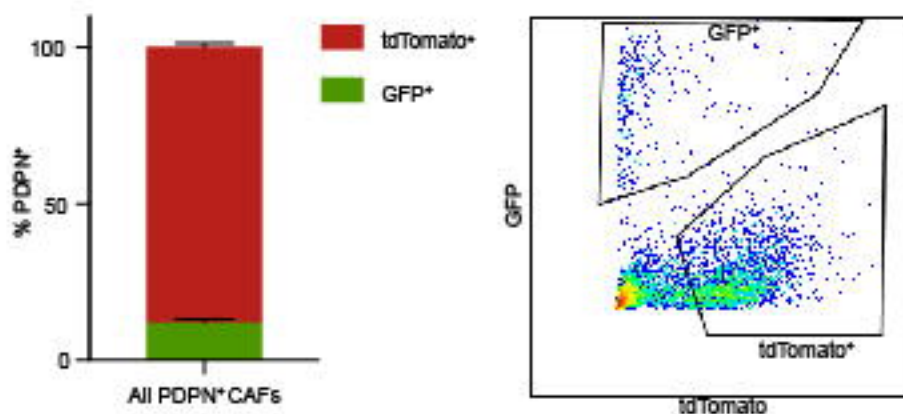

Figure 3

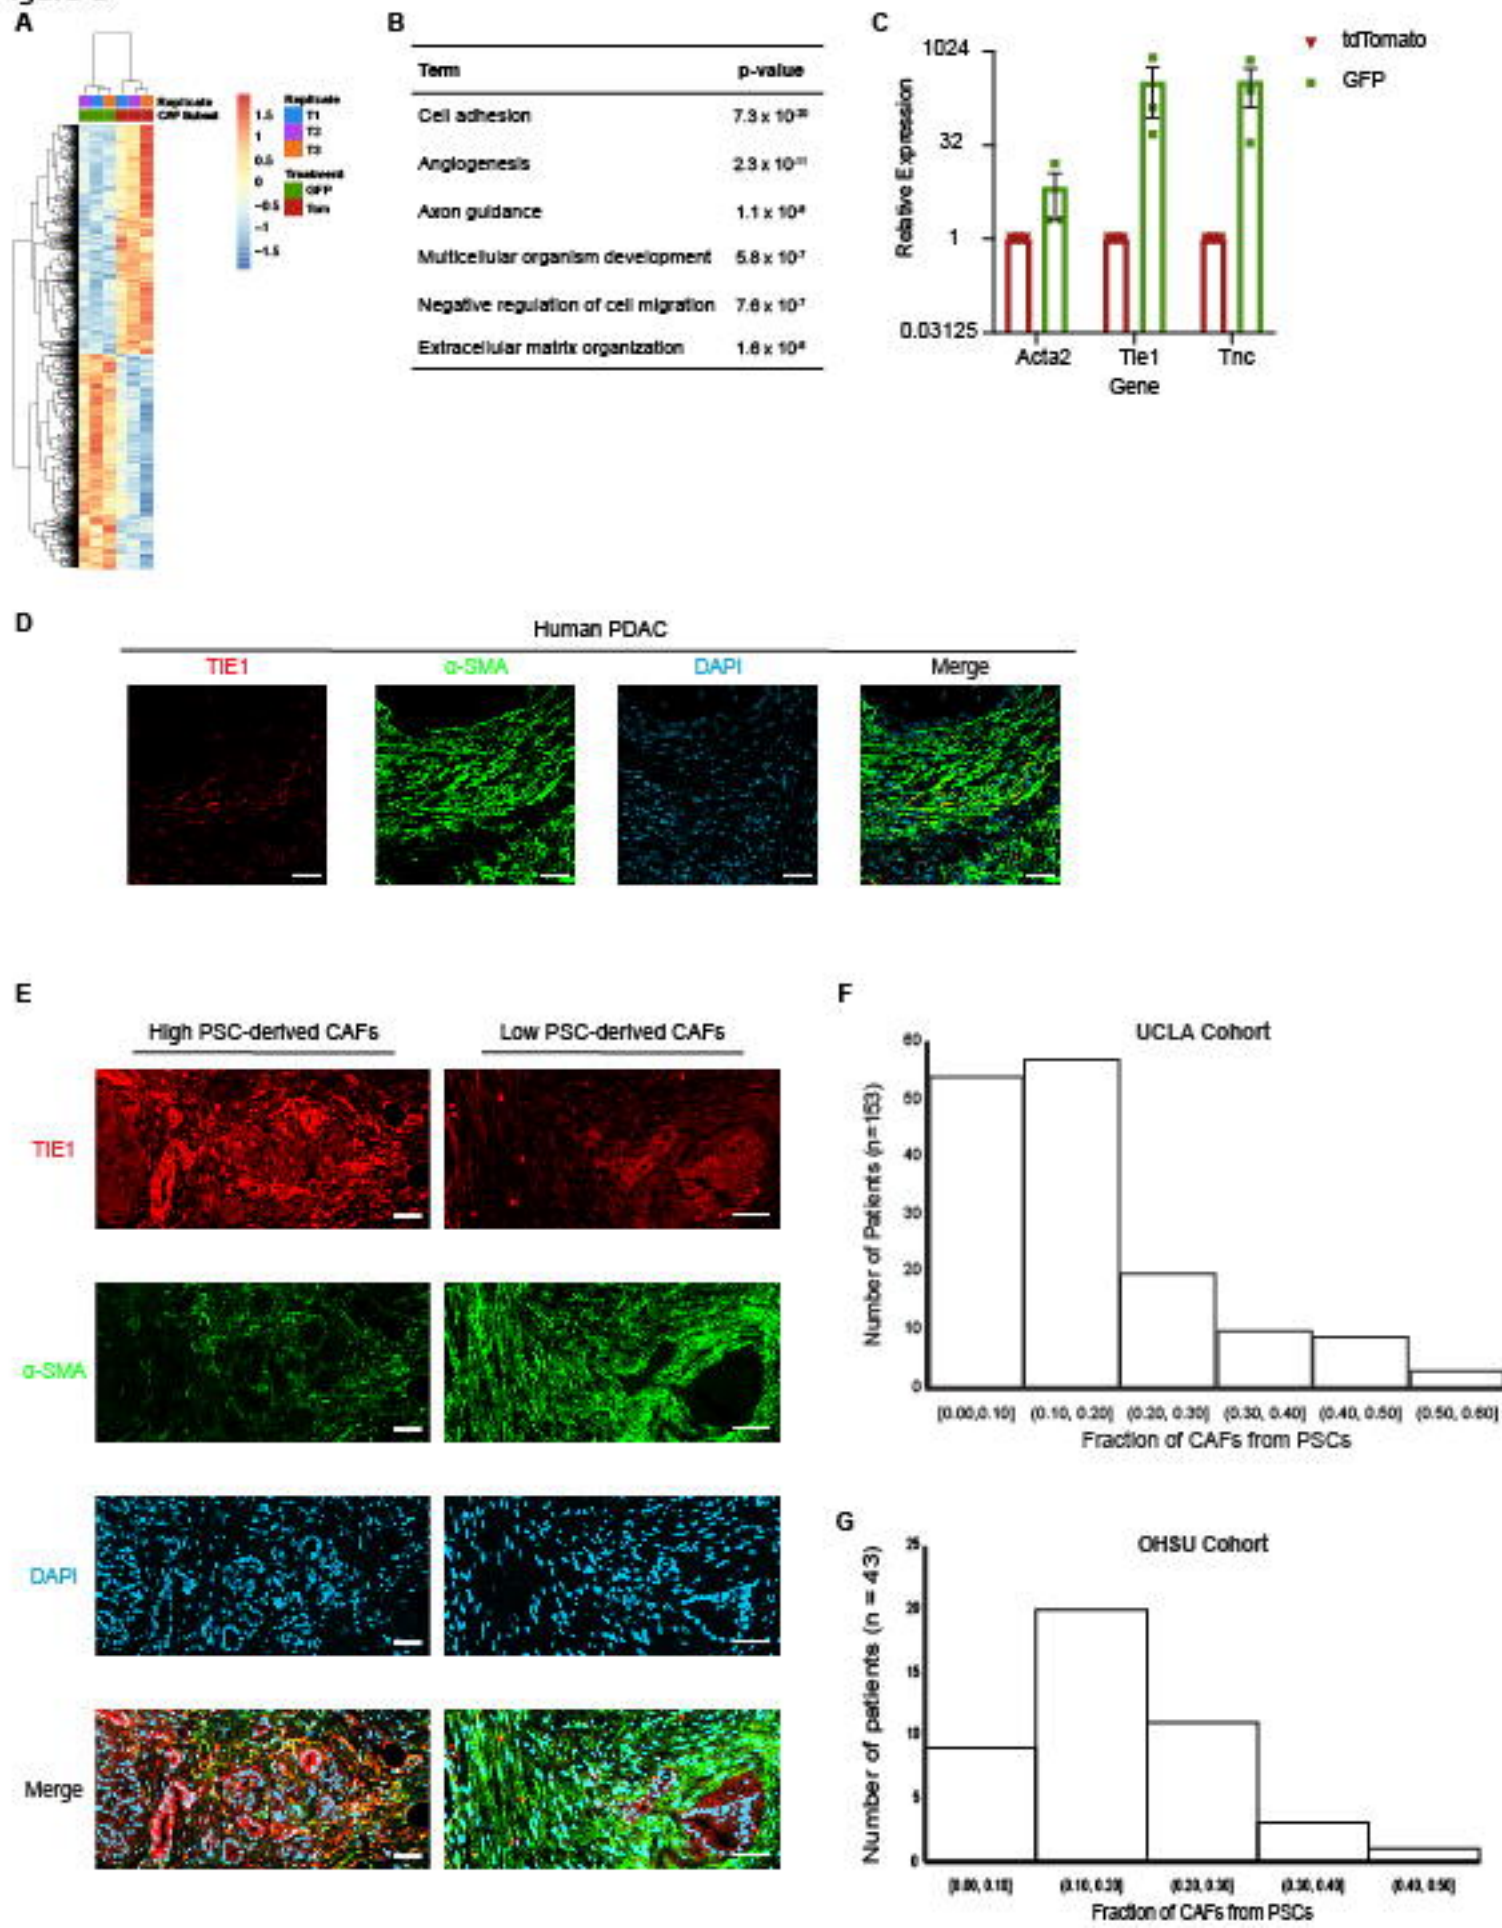

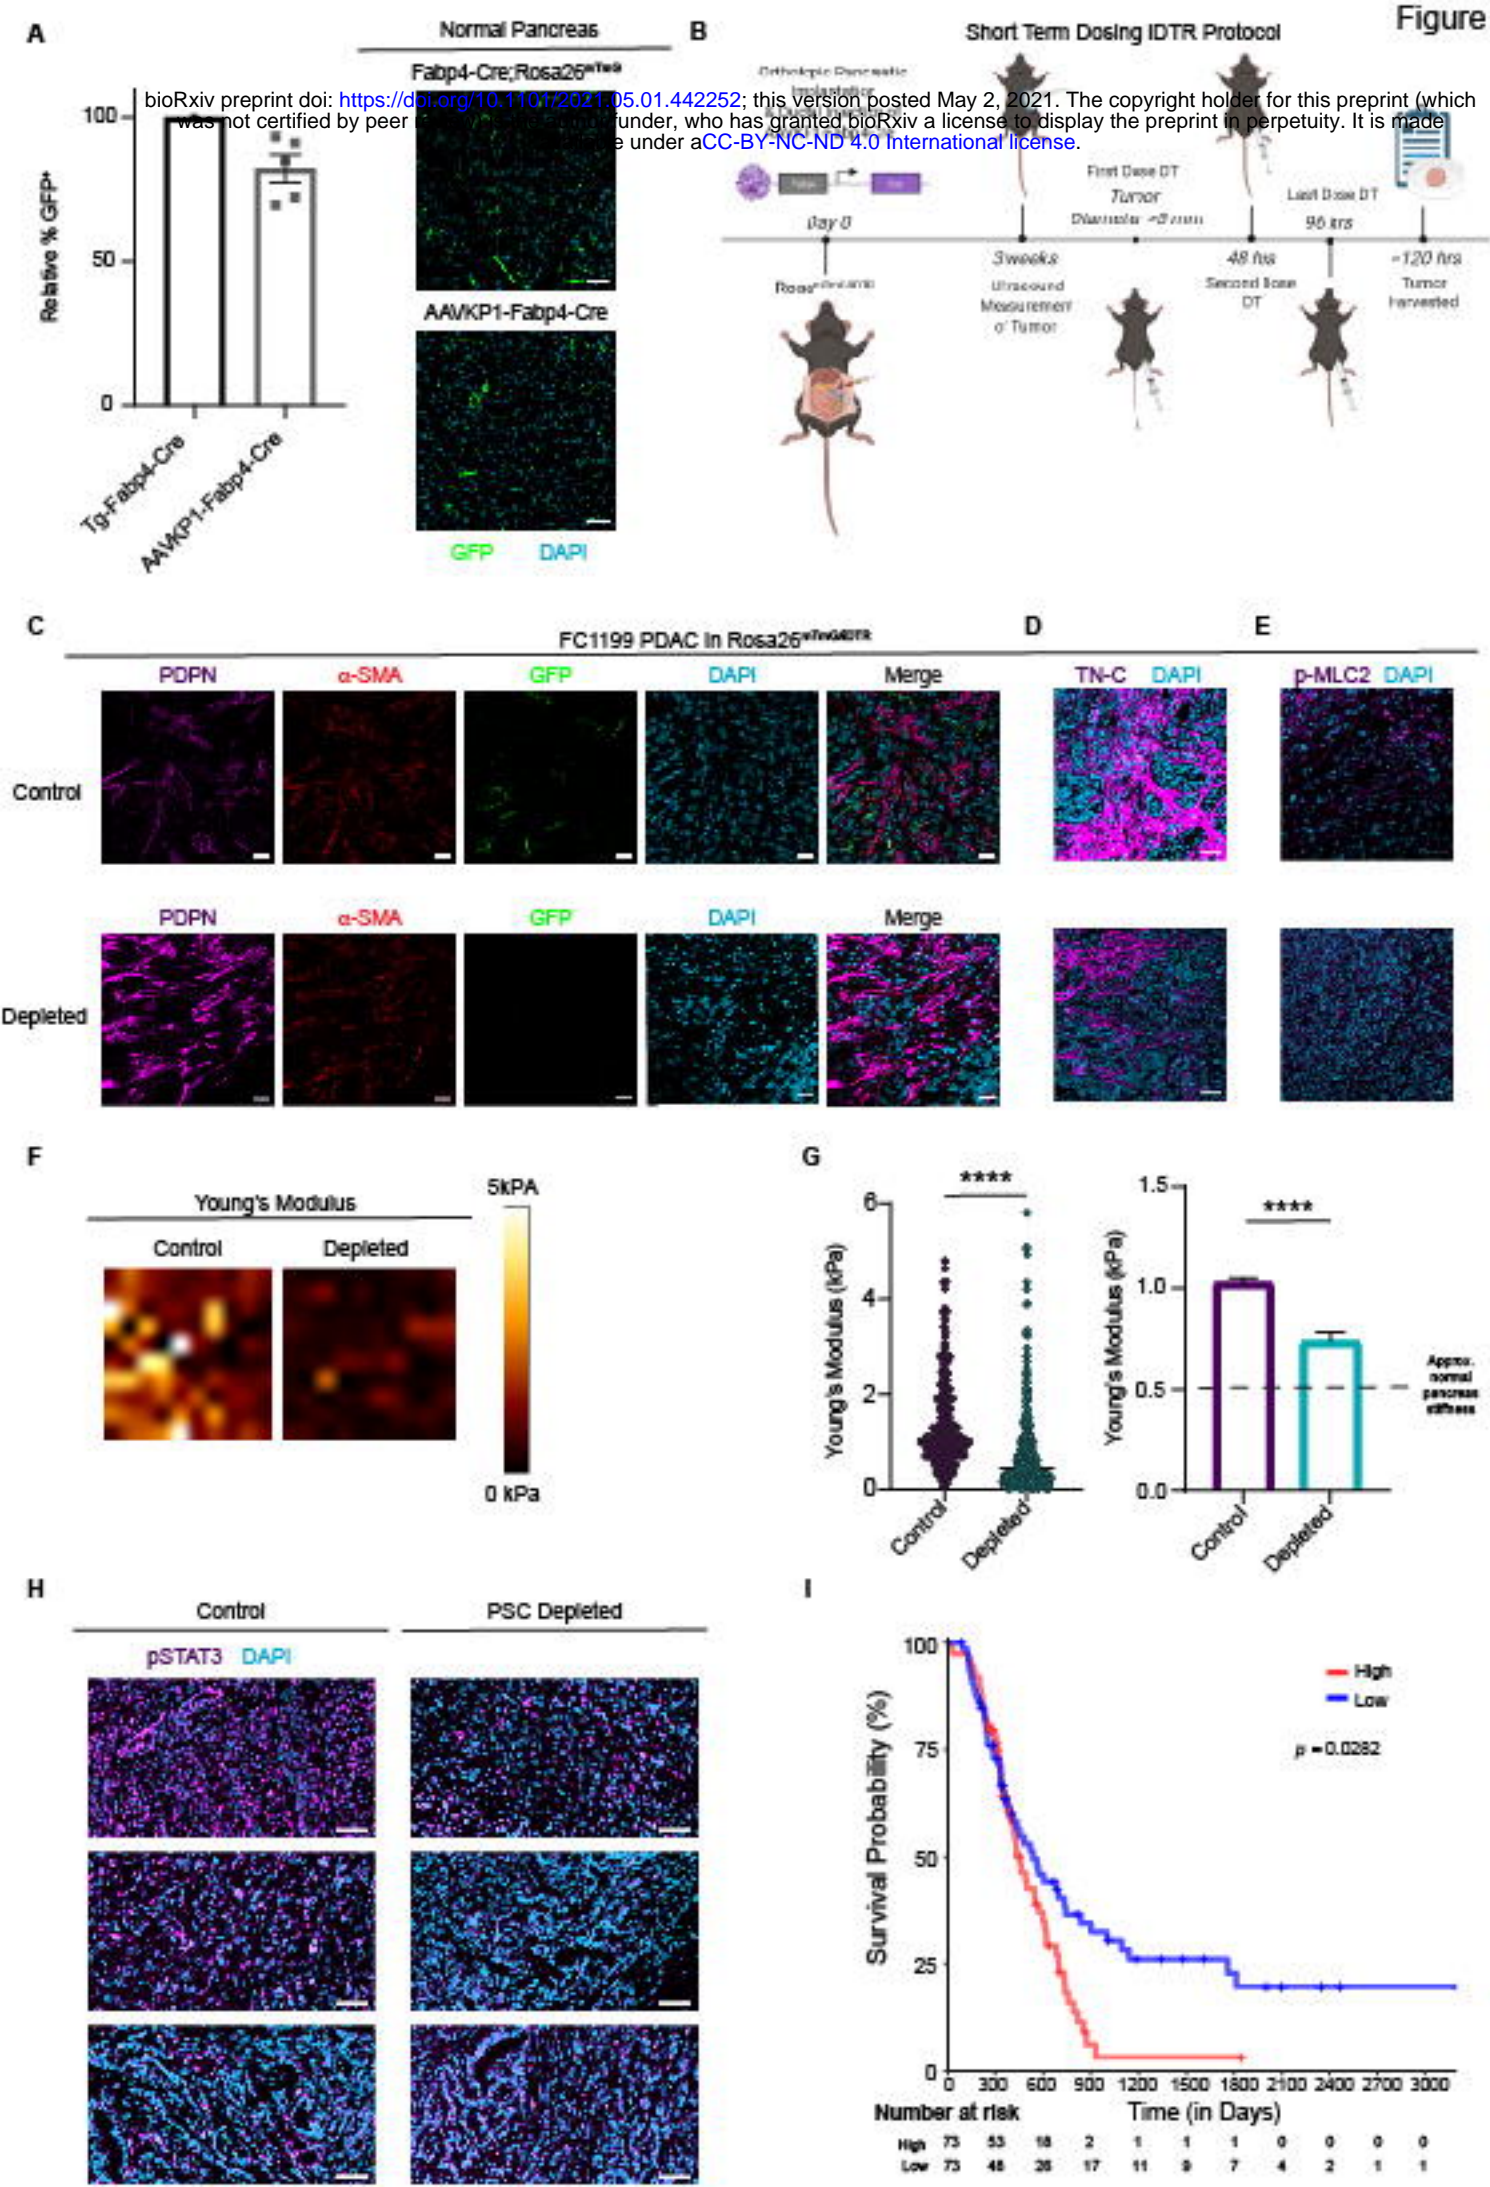

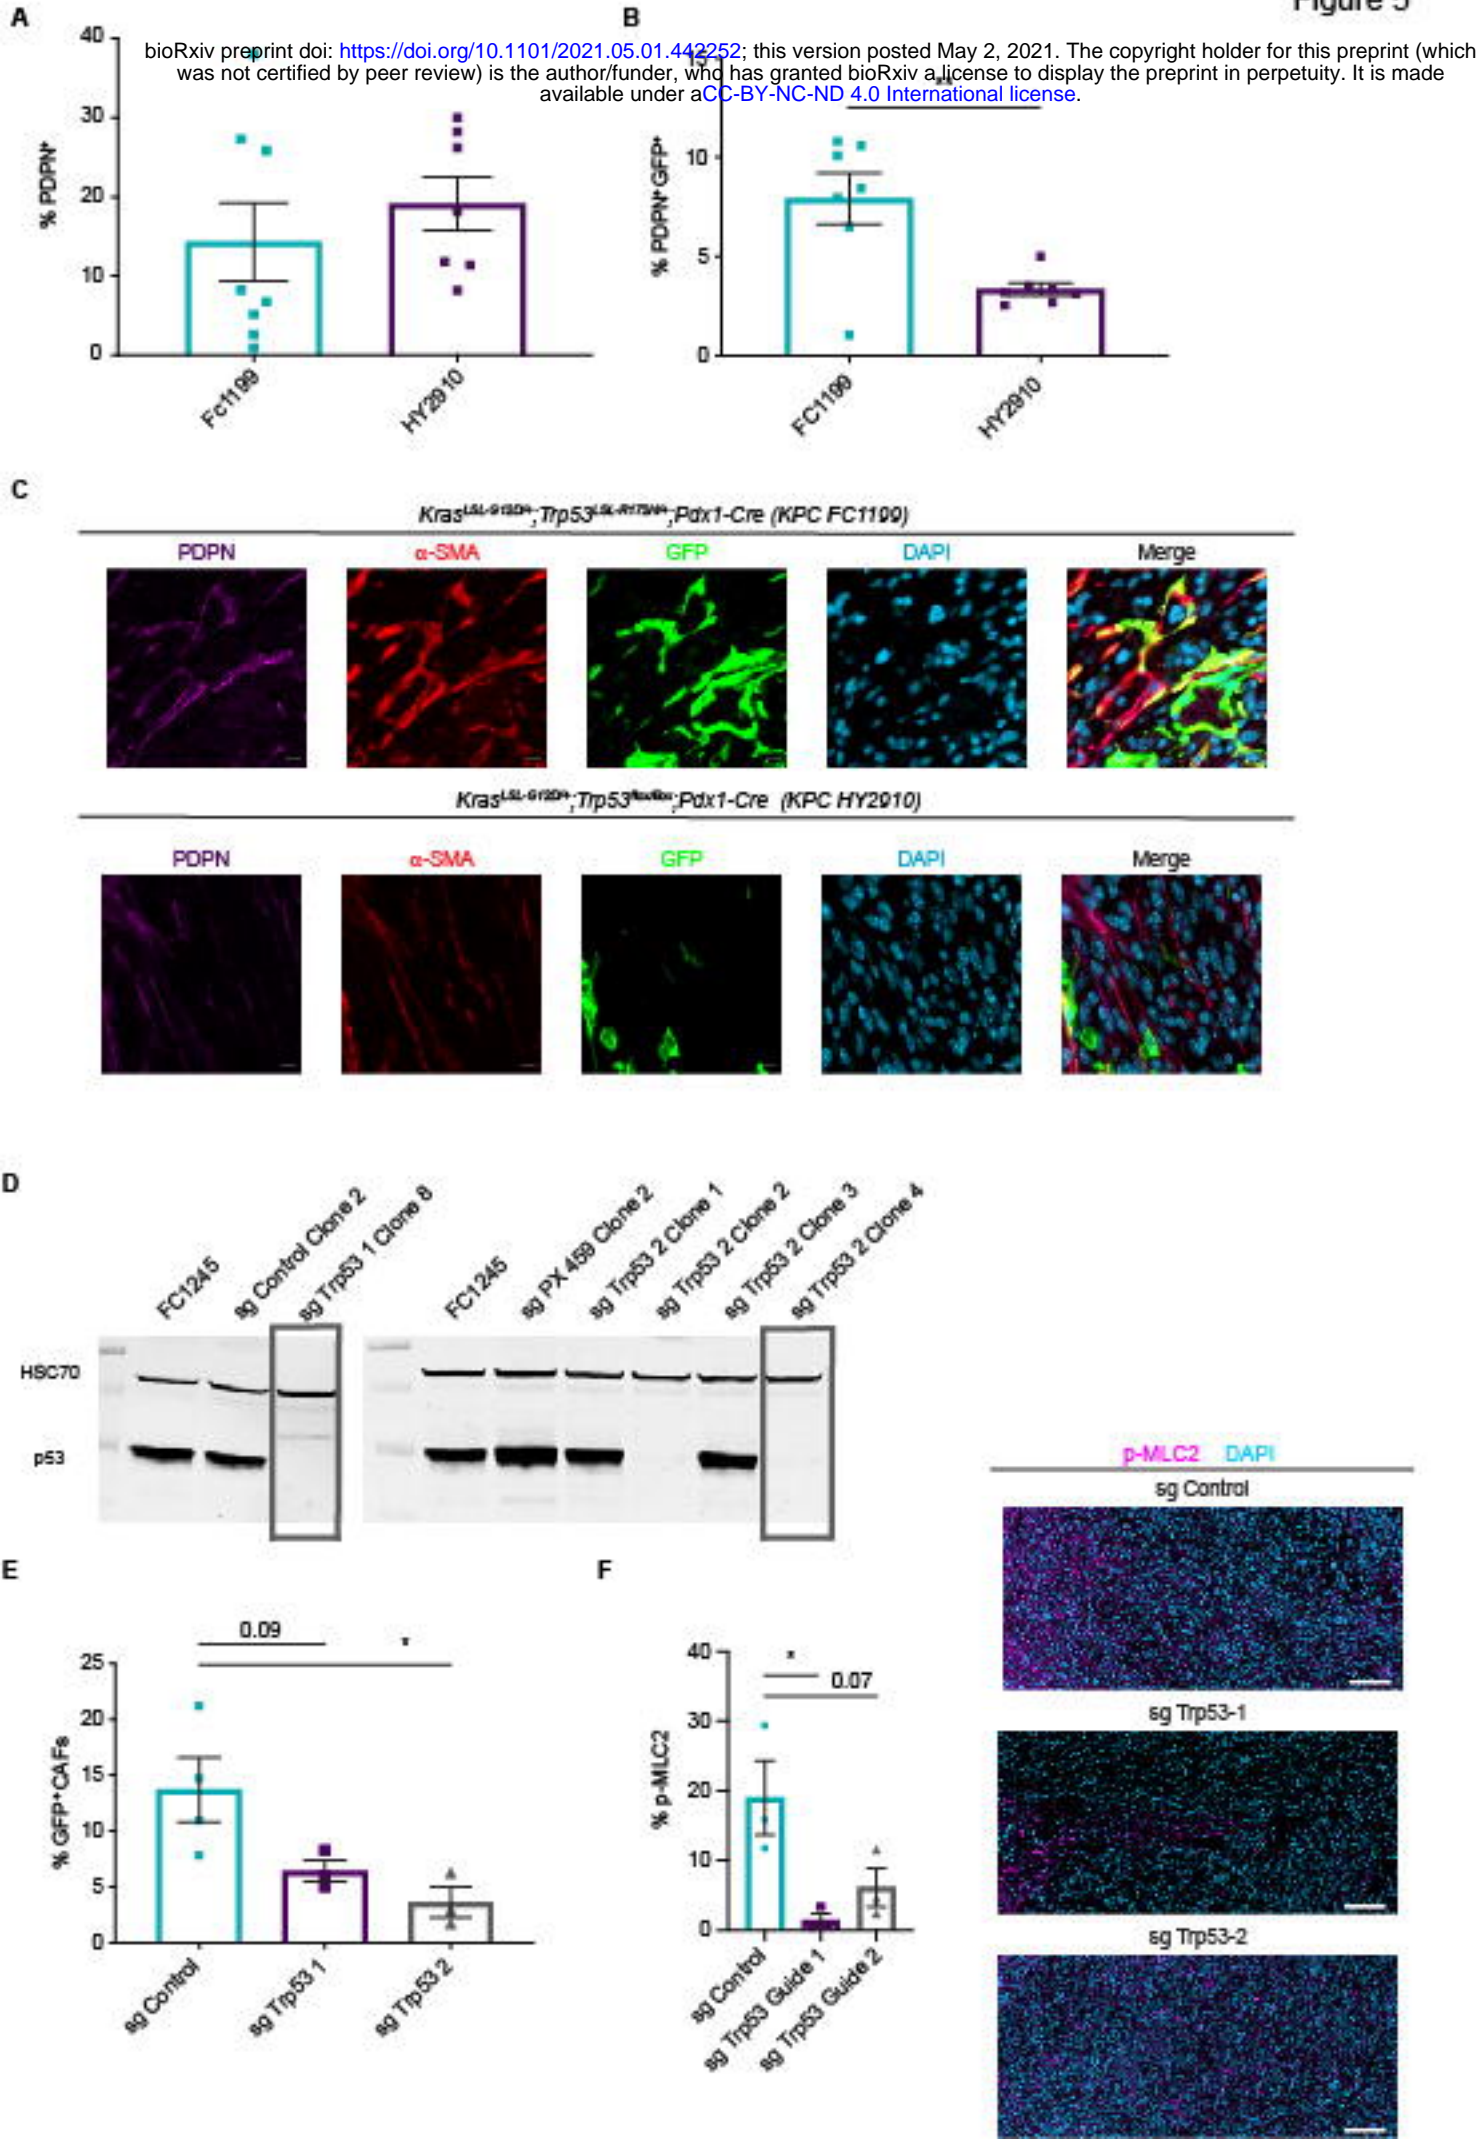

Source: https://www.biorxiv.org/content/biorxiv/early/2021/05/02/2021.05.01.442252.full.pdf
